# Differences in neurotoxic outcomes of organophosphorus pesticides revealed via multi-dimensional screening in adult and regenerating planarians

1 **Danielle Ireland<sup>1</sup>, Siqi Zhang<sup>2</sup>, Veronica Bochenek<sup>1</sup>, Jui-Hua Hsieh<sup>3</sup>, Christina Rabeler<sup>1</sup>, Zane**  
2 **Meyer<sup>4,5</sup>, and Eva-Maria S. Collins<sup>1, 6, 7, 8\*</sup>**

3 <sup>1</sup>Department of Biology, Swarthmore College, Swarthmore, PA, United States of America

4 <sup>2</sup>Department of Bioengineering, University of California San Diego, La Jolla, CA, United States of  
5 America

6 <sup>3</sup>Division of the National Toxicology Program, National Institute of Environmental Health Sciences,  
7 Research Triangle Park, North Carolina, United States of America

8 <sup>4</sup>Department of Engineering, Swarthmore College, Swarthmore, PA, United States of America

9 <sup>5</sup>Department of Computer Science, Swarthmore College, Swarthmore, PA, United States of America

10 <sup>6</sup>Department of Physics and Astronomy, Swarthmore College, Swarthmore, Pennsylvania, United  
11 States of America

12 <sup>7</sup>Department of Neuroscience, Perelman School of Medicine, University of Pennsylvania,  
13 Philadelphia, PA, United States of America

14 <sup>8</sup>Center of Excellence in Environmental Toxicology, University of Pennsylvania, Philadelphia, PA,  
15 United States of America

16

17 **\* Correspondence:**

18 Eva-Maria S. Collins

19 [ecollin3@swarthmore.edu](mailto:ecollin3@swarthmore.edu)

20 **Keywords: planarian, organophosphorus pesticides, developmental neurotoxicity, behavior,**  
21 **new approach method, benchmark concentration.**

22 **Length:** 9427 words

23 **Number of figures:** 6

24 **Number of tables:** 4

25

26 **Abstract**

27 Organophosphorus pesticides (OPs) are a chemically diverse class of commonly used insecticides.  
28 Epidemiological studies suggest that low dose chronic prenatal and infant exposures can lead to life-  
29 long neurological damage and behavioral disorders. While inhibition of acetylcholinesterase (AChE)  
30 is the shared mechanism of acute OP neurotoxicity, OP-induced developmental neurotoxicity (DNT)

31 can occur independently and/or in the absence of significant AChE inhibition, implying that OPs  
32 affect alternative targets. Moreover, different OPs can cause different adverse outcomes, suggesting  
33 that different OPs act through different mechanisms. These findings emphasize the importance of  
34 comparative studies of OP toxicity. Freshwater planarians are an invertebrate system that uniquely  
35 allows for automated, rapid and inexpensive testing of adult and developing organisms in parallel to  
36 differentiate neurotoxicity from DNT. Effects found only in regenerating planarians would be  
37 indicative of DNT, whereas shared effects may represent neurotoxicity. We leverage this unique  
38 feature of planarians to investigate potential differential effects of OPs on the adult and developing  
39 brain by performing a comparative screen to test 7 OPs (acephate, chlorpyrifos, dichlorvos, diazinon,  
40 malathion, parathion and profenofos) across 10 concentrations in quarter-log steps. Neurotoxicity  
41 was evaluated using a wide range of quantitative morphological and behavioral readouts. AChE  
42 activity was measured using an Ellman assay. The toxicological profiles of the 7 OPs differed across  
43 the OPs and between adult and regenerating planarians. Toxicological profiles were not correlated  
44 with levels of AChE inhibition. Twenty-two “mechanistic control compounds” known to target  
45 pathways suggested in the literature to be affected by OPs (cholinergic neurotransmission, serotonin  
46 neurotransmission, endocannabinoid system, cytoskeleton, adenyl cyclase and oxidative stress) and 2  
47 negative controls were also screened. When compared with the mechanistic control compounds, the  
48 phenotypic profiles of the different OPs separated into distinct clusters. The phenotypic profiles of  
49 adult vs regenerating planarians exposed to the OPs clustered differently, suggesting some  
50 developmental-specific mechanisms. These results further support findings in other systems that OPs  
51 cause different adverse outcomes in the (developing) brain and build the foundation for future  
52 comparative studies focused on delineating the mechanisms of OP neurotoxicity in planarians.

## 53 **1 Introduction**

54 Organophosphorus pesticides (OPs) are among the most agriculturally important and common  
55 pesticides used today (EUROSTAT, 2016; Atwood and Paisley-Jones, 2017), especially in developing  
56 countries (Kaur and Singh, 2020). OPs kill pests by inhibiting the enzyme acetylcholinesterase  
57 (AChE) (Russom et al., 2014; Costa, 2018; Taylor, 2018), which is responsible for hydrolyzing the  
58 neurotransmitter acetylcholine (ACh). AChE inhibition causes cholinergic toxicity, ultimately  
59 manifesting as paralysis and death, in both insects and humans. This mechanism makes OPs effective  
60 pesticides, but because it acts the same way in humans as in insects, it is necessary to avoid human  
61 exposure to acutely toxic OP concentrations. This is of special concern in developing countries, such  
62 as India (Kaur and Singh, 2020) and South Africa (Razwiedani and Rautenbach, 2017), where  
63 accidental OP poisoning is prevalent. Moreover, growing evidence correlates chronic prenatal and  
64 infant exposure to subacute levels of OPs with life-long neurological damage and behavioral  
65 disorders (Rauh et al., 2011; Muñoz-Quezada et al., 2013; González-Alzaga et al., 2014; Shelton et  
66 al., 2014; Burke et al., 2017; Sagiv et al., 2021). These epidemiological studies are especially  
67 alarming given the environmental abundance of OPs.

68  
69 Moreover, some OPs have been shown to affect secondary targets independent of and/or in the  
70 absence of significant AChE inhibition. OPs have been found to bind to human albumin (Peeples et  
71 al., 2005), and to rodent muscarinic ACh receptors (AChRs) (Howard and Pope, 2002; Lein and  
72 Fryer, 2005; Proskocil et al., 2010), demonstrating that OPs can directly interact with other proteins.  
73 OP-induced DNT in animals in the absence of significant AChE inhibition has been linked to a  
74 multitude of other secondary targets as well, depending on the system, OP, and exposure protocol  
75 (Dam et al., 2000; Slotkin, 2006; Slotkin et al., 2006b; Yang et al., 2008; Brown and Pearson, 2015;  
76 Mamczarz et al., 2016; Schmitt et al., 2019). Other proposed secondary targets include nicotinic  
77 AChRs, other esterases, and non-esterase, non-cholinergic targets such as serotonin receptors,

78 cytoskeletal proteins, mitochondria, and glial cells (Pope, 1999; Guizzetti et al., 2005; Pope et al.,  
79 2005a; Slotkin et al., 2006b, 2017; Carr et al., 2014; Burke et al., 2017). The impact of all of these  
80 effects remains unclear, however, because it has been difficult to ascertain direct connections between  
81 molecular/cellular endpoints and brain function (behavioral) deficits.

82  
83 Most mechanistic OP research has been focused on chlorpyrifos (CPF). Animal studies have shown  
84 that neurodevelopmental low-level exposure to CPF or its active metabolite, CPF-oxon (CPFO), can  
85 cause increased oxidative stress, cell death, and structural and functional neuronal deficits (Crumpton  
86 et al., 2000; Caughlan et al., 2004; Levin et al., 2004; Slotkin, 2004, 2006; Yang et al., 2011). CPF  
87 has been shown to bind to the microtubule associated motor protein kinesin (Gearhart et al., 2007)  
88 and CPFO to bind to tubulin and affect polymerization (Prendergast et al., 2007; Grigoryan et al.,  
89 2008; Jiang et al., 2010), implying that observed defects in axonal outgrowth and transport in animal  
90 studies may be a direct consequence of these interactions. The effects of developmental CPF  
91 exposure in animals have been found to be irreversible (Slotkin et al., 2001). These studies support  
92 epidemiological findings (e.g., (Rauh et al., 2011, 2012)) suggesting a causal link between  
93 developmental CPF exposure and long-term negative health effects. These data prompted the U.S.  
94 EPA to ban all food uses of CPF by 2022. Now other, less studied OPs are among the pesticides  
95 replacing CPF. Whether these OPs are indeed safer alternatives or also cause adverse effects on  
96 neurodevelopment is unclear. It is difficult to extrapolate the low dose toxicity profiles of other OPs  
97 from data on CPF, because OPs are structurally diverse with known pharmacokinetic (Pope, 1999;  
98 Jansen et al., 2009) and possible pharmacodynamic differences (Pope, 1999; Pope et al., 2005a;  
99 Terry, 2012). Comparative studies in rats have shown that different OPs damage the developing brain  
100 to varying extents, resulting in different adverse outcomes (Moser, 1995; Pope, 1999; Slotkin et al.,  
101 2006a; Richendrfer and Creton, 2015; Voorhees et al., 2016) and effects on developmental  
102 trajectories (Slotkin et al., 2006b), reinforcing the need to thoroughly evaluate individual OPs to  
103 better understand any potential compound-specific toxicity. Thus far, however, studies have largely  
104 been limited to either 1-4 compounds at a time (Slotkin et al., 2006a, 2006b, 2007; Yen et al., 2011;  
105 Richendrfer and Creton, 2015; Schmitt et al., 2019) or to studying acute and short term effects  
106 (Moser, 1995; Cole et al., 2004; Koenig et al., 2020).

107  
108 To fill this data gap, we utilized high-throughput screening (HTS) in the asexual freshwater planarian  
109 *Dugesia japonica* to compare the toxicity profiles of 7 OPs (acephate, CPF, dichlorvos, diazinon,  
110 malathion, parathion, and profenofos). These OPs were chosen because of their environmental  
111 abundance, differences in chemical structures, and known potency in planarians from our previous  
112 work quantifying the *in vitro* inhibition rates of the respective oxons (Hagstrom et al., 2017a). Some  
113 of these OPs require metabolic activation by cytochromes P450 into their oxon form to inhibit AChE  
114 (CPF, parathion, diazinon, and malathion) and some can directly inhibit AChE (dichlorvos,  
115 profenofos, acephate). We have previously shown that exposure to diazinon, which does require  
116 bioactivation, results in significant AChE inhibition in both adult and regenerating planarians,  
117 suggesting that planarians can bioactivate OPs at all life stages (Hagstrom et al., 2018).

118  
119 We have demonstrated that *D. japonica* is a unique and apt system for developmental  
120 neurotoxicology (Hagstrom et al., 2015, 2016, 2019; Zhang et al., 2019a, 2019b; Ireland et al., 2020).  
121 Neuro-regeneration is the sole form of neurodevelopment in this asexual species and shares  
122 fundamental processes with vertebrate neurodevelopment (Cebrià, 2007; Hagstrom et al., 2016; Ross  
123 et al., 2017). Thus, neurodevelopment can be induced by amputation, wherein the tail piece will  
124 regenerate a new brain within 12 days (Hagstrom et al., 2016). As intact and decapitated planarians  
125 are of similar size, adult and regenerating specimen can be tested in parallel with the same assays,  
126 providing the unique opportunity to directly identify effects specific to neurodevelopment. The

127 planarian central nervous system, while morphologically simple, has considerable cellular and  
128 functional complexity (Cebrià, 2007; Ross et al., 2017). Planarians and mammals share key  
129 neurotransmitters (Ribeiro et al., 2005; Pagán, 2014), including ACh, which has been shown to  
130 regulate motor activity in *D. japonica* (Nishimura et al., 2010). Moreover, we identified 2 putative  
131 genes responsible for cholinesterase function in *D. japonica*, which were sensitive to OP inhibition  
132 and whose knockdown recapitulated some phenotypes of subacute OP exposure (Hagstrom et al.,  
133 2017a, 2018). Lastly, planarians have a variety of different quantifiable behaviors which can be  
134 assayed to assess neuronal functions. Importantly, several of these behaviors have been shown to be  
135 coordinated by distinct neuronal subpopulations (Nishimura et al., 2010; Inoue et al., 2014; Birkholz  
136 and Beane, 2017) allowing us to link functional adverse outcomes with cellular effects.

137  
138 To begin to delineate the molecular mechanisms underlying OP toxicity, we compared the  
139 toxicological profiles of 7 OPs to chemicals with known modes of action (Table 1). These included  
140 cholinergic activators, such as carbamate AChE inhibitors (aldicarb and physostigmine) and nicotinic  
141 and muscarinic AChRs agonists (nicotine/anatoxin-a and muscarine/bethanechol, respectively). By  
142 testing both AChE inhibitors and the receptor agonists, we hoped to parse out effects specific to the  
143 nicotinic or muscarinic systems, especially since some OPs have been found to target the receptors  
144 directly (Howard and Pope, 2002; Smulders et al., 2004; Lein and Fryer, 2005; Proskocil et al., 2010).  
145 We also tested compounds known to affect alternative targets suggested in the literature to be affected  
146 by OPs. First, as cytoskeletal proteins such as actin and tubulin have been suggested to be direct  
147 targets of OPs (Jiang et al., 2010; Flaskos, 2012, 2014; Zarei et al., 2015), we tested actin  
148 polymerization inhibitors, cytochalasin D and latrunculin A, and anti-mitotic drugs (microtubules),  
149 nocodazole and colchicine. Second, fatty acid amide hydrolase (FAAH) has been shown to be  
150 inhibited by CPF leading to accumulation of the endocannabinoid anandamide and subsequent  
151 activation of the CB-1 receptor (Casida and Quistad, 2004; Liu et al., 2013; Carr et al., 2014). Thus,  
152 we characterized the toxicological effects of anandamide and the CB-1 receptor agonist WIN 55 212-  
153 2, which has previously been shown to affect planarian behavior (Buttarelli et al., 2002). We used  
154 mianserin, sertraline, buspirone, and fluoxetine to study potential disruption of the serotonergic  
155 system, which has been found to be sensitive to OP exposure during development (Aldridge et al.,  
156 2005; Slotkin et al., 2006b; Slotkin and Seidler, 2008), and LRE-1 and MDL-12,330A to study  
157 inhibition of adenylyl cyclase, another proposed developmental OP target (Song et al., 1997; Slotkin  
158 and Seidler, 2008). Lastly, to test the effects of oxidative stress, which has been linked to OP DNT  
159 (Crumpton et al., 2000; Fortunato et al., 2006), we evaluated the effects of rotenone and L-buthionine  
160 sulfoxime.

161  
162 Using this comparative screening approach, we found differences in neurotoxicity and DNT for the 7  
163 OPs in adult and regenerating planarians, respectively. Toxicological profiles were not correlated  
164 with levels of AChE inhibition. Using hierarchical clustering of the phenotypic profiles, we identified  
165 6 clusters each in adult and regenerating planarians. The endpoints affected by the OPs and  
166 hierarchical clustering of OP phenotypes with those induced by the mechanistic control compounds  
167 differed between adult and regenerating planarians, suggesting that the planarian system can detect  
168 development-specific toxicity. For both worm types, we found a cluster that was indicative of  
169 cholinergic toxicity. However, certain OPs and concentrations were also found in the other clusters,  
170 implying effects on alternative targets. Together, our data show that planarian HTS can recapitulate  
171 the diverse toxicity profiles of OPs that have been observed in other systems and that these  
172 differences cannot be explained by levels of AChE inhibition. Cluster analysis suggests that OPs  
173 affect multiple targets in planarians and that the adverse outcomes differ depending on the  
174 developmental stage, emphasizing the need for more comparative OP studies to better understand the  
175 mechanisms by which OPs damage the nervous system.

176

## 177 2 Materials and Methods

### 178 2.1 Test animals

179 Freshwater planarians of the species *Dugesia japonica*, originally obtained from Shanghai  
180 University, China and cultivated in our lab for > 8 years, were used for all experiments. Planarians  
181 were stored in 1x Instant Ocean (IO, Blacksburg, VA) in Tupperware containers and kept at 20°C in  
182 a Panasonic refrigerated incubator in the dark. The animals were fed either organic freeze-dried  
183 chicken liver (either Mama Dog's or Brave Beagle, both from Amazon, Seattle, WA) or fresh organic  
184 chicken or beef liver from a local butcher once a week. Their aquatic environment was cleaned twice  
185 a week following standard protocols (Dunkel et al., 2011). For all experiments, only fully regenerated  
186 worms which had not been fed within one week and which were found gliding normally in the  
187 container were used. Planarians were manually selected to fall within a certain range of sizes, with  
188 larger planarians used for amputation/regeneration experiments, such that the final sizes of adult and  
189 regenerating tails were similar. To induce development/regeneration, intact planarians were  
190 amputated on day 1 by cutting posterior to the auricles and anterior to the pharynx with an ethanol-  
191 sterilized razor blade. Exposure began within 3 hours of amputation.

192

### 193 2.2 Chemical preparation

194 Table 1 lists the chemicals used in this study. Two presumed negative control chemicals, D-glucitol  
195 and L-ascorbic acid, previously shown to not affect planarian behavior or morphology (Zhang et al.,  
196 2019a), were also screened. L-ascorbic acid was inactive in all endpoints as expected. D-glucitol was  
197 active in one locomotion-based outcome measure each in adult and regenerating planarians at the  
198 highest tested concentration (100 µM). Both of these outcomes were from new endpoints we had not  
199 previously evaluated. Thus, D-glucitol at 100 µM may not be an appropriate negative control for this  
200 system. Chemical stock solutions were prepared in 100% dimethyl sulfoxide (DMSO, Sigma-  
201 Aldrich, Saint Louis, MO) or milliQ water depending on solubility. All stock solutions were stored at  
202 -20°C. Each OP was tested at 10 concentrations over quarter-log steps. For all other chemicals, 5  
203 concentrations were tested using semi-log steps. The highest concentrations were chosen, based on  
204 preliminary tests, to be at the threshold to cause lethality or overt systemic toxicity so that we could  
205 focus on sublethal behavioral effects. If lethality was not observed the highest soluble concentration  
206 was used. Diazinon and dichlorvos were found to have significant effects at the lowest tested  
207 concentrations in our preliminary analysis and thus were rescreened at 3 and 2 lower concentrations  
208 (quarter-log steps), respectively.

209

210 Chemical stock plates were prepared in 96-well plates (Genesee Scientific, San Diego, CA) by  
211 adding 200X stock solutions from the highest tested concentration to one well of the plate. Serial  
212 dilutions were then made in DMSO or IO water. The control well contained pure DMSO or IO water.  
213 In the final screening plates, either 0.5% DMSO, which has no effects on planarian morphology or  
214 behavior (Hagstrom et al., 2015), or IO water were used as solvent controls. Stock plates were sealed  
215 and stored at -20 °C for up to 3 months. For the OPs, the screening data comes from two separate  
216 screens due to a laboratory relocation. For all other chemicals, all concentrations were screened  
217 together in one of the two screens, with the chemicals split between the two locations. Colchicine  
218 was screened in duplicate to evaluate consistency of results between the two screens. The results  
219 between the two screens were consistent at low to medium concentrations, but we obtained a few hits  
220 (body shape at day 7 and day 12 and scrunching) at the highest concentration in one of the screens.

221 These small differences in sensitivity may be due to changes in food source and availability, as  
222 previously discussed (Zhang et al., 2019a).  
223

### 224 **2.3 Screening plate setup**

225 Each 48-well screening plate (Genesee Scientific) assayed 8 planarians in the solvent control (0.5%  
226 DMSO or IO water), and 8 planarians each per concentration of chemical (5 test concentrations per  
227 plate). Experiments were performed in at least triplicate (independent experiments performed on  
228 different days). Some chemical conditions and specific assays were repeated due to poor health in the  
229 control population or technical malfunction. The orientation of the concentrations in the plate was  
230 shifted down 2 rows in each replicate to control for edge effects (Zhang et al., 2019a). For each  
231 chemical and experiment, one plate containing adult (intact) planarians and one plate containing  
232 regenerating tails (2 plates total) were assayed. For the OPs, 2 plates of each worm type were  
233 screened to cover the 10 test concentrations.  
234

235 Screening plates were prepared as described in (Zhang et al., 2019a) with one adult planarian or tail  
236 piece in each well of a 48-well plate containing 200  $\mu$ l of the nominal concentration of test solution  
237 and sealed with ThermalSeal RTS seals (Excel Scientific, Victorville, CA). The plates were stored,  
238 without their lids, in stacks in the dark at room temperature when not being screened. Since we  
239 previously found that worms that underwent asexual reproduction (fission) produced challenges in  
240 our automated data analysis pipeline (Zhang et al., 2019b) and because planarian fission is  
241 suppressed when disturbed (Malinowski et al., 2017), the plates were gently agitated by hand once  
242 every 1-2 days when not being screened to discourage fission. Prepared plates were only moved to  
243 the screening platform when screened at day 7 and day 12.  
244

### 245 **2.4 Screening platform**

246 Screening was performed on an expanded version of the planarian screening platform described in  
247 (Zhang et al., 2019a; Ireland et al., 2020). Briefly, this platform consists of a commercial robotic  
248 microplate handler (Hudson Robotics, Springfield Township, NJ) and multiple cameras and assay  
249 stations, which are computer controlled. Outcomes measures were obtained from studying planarian  
250 behavior on the assay stations (phototaxis/locomotion/morphology, stickiness, thermotaxis, and  
251 noxious heat sensing/scrunching). We modified phototaxis from the assay described in (Zhang et al.,  
252 2019a; Ireland et al., 2020) to measure the planarians' response to different wavelength (red, green,  
253 blue) light using RGB lights (DAYBETTER, Shenzhen, China). Planarians are insensitive to red,  
254 detect green with their eyes, and blue with their skin pigment and eyes (Brown et al., 1968; Paskin et  
255 al., 2014; Birkholz and Beane, 2017; Shettigar et al., 2017). Therefore, using green and blue light  
256 stimuli allows us to discern between effects specific to the photoreceptors (green light) versus effects  
257 on extraocular perception through the skin. The phototaxis assay was performed as follows: First, to  
258 lower the variability of the animals' background activity, planarians were allowed to acclimate for 3  
259 min. After this acclimation period, the plate was imaged for 5 minutes: 1-min red light (1<sup>st</sup> dark  
260 cycle), 1-min green light (light cycle), 2-min red light (2<sup>nd</sup> dark cycle), 1-min blue light (light cycle).  
261 The temporal reaction of the planarians to the different light periods was quantified by calculating the  
262 average speed in every 30 second interval using center of mass tracking. Morphology data was  
263 collected by either imaging planarians using 4 cameras as described in (Zhang et al., 2019a) or by  
264 imaging with a single high resolution camera (Basler acA5472, Basler, Germany), with both imaging  
265 methods yielding the same resolution and number of frames per well. Identification of lethality and

266 different abnormal body shape categories (Ireland et al., 2020) was performed manually by a  
267 reviewer who was blind to the chemical identities. Stickiness was conducted as described in (Ireland  
268 et al., 2020), and measures the number of worms that are stuck/unstuck when the plate is shaken at a  
269 fixed rotation per minute (RPM). Thermotaxis and scrunching were conducted as described in  
270 (Zhang et al., 2019a; Ireland et al., 2020), measuring the planarians' response to low temperature  
271 gradients and noxious heat, respectively.

272  
273 We have also added additional endpoints to quantify anxiety and locomotor bursts (Supplementary  
274 Figure 1). Anxiety was measured during the second dark phase of the phototaxis assay and calculated  
275 as time spent at well boundary / total time tracked. Higher anxiety scores represent less exploration as  
276 planarians prefer gliding along the container wall (Akiyama et al., 2015). We defined locomotor  
277 bursts as instances when a planarian accelerated from resting (speed <0.2 mm/s) to moving (speed  
278 >0.2 mm/s) and calculated the total cumulative number of locomotor bursts and the ratio of  
279 locomotor bursts in the blue period compared to the second dark period during phototaxis. Only blue  
280 light was used because planarians are most sensitive to short wavelengths (blue/ultraviolet) (Paskin et  
281 al., 2014; Shettigar et al., 2017) and thus their behavior changes are more robust in blue versus green  
282 light. These new endpoints were assayed on both day 7 and day 12. Data was primarily analyzed  
283 using MATLAB (MathWorks, Natick, MA). Data analysis was performed blinded with no chemical  
284 information provided. Chord diagrams were created using the circlize package (Gu et al., 2014) in R  
285 (R Core Team, 2016).

286

## 287 **2.5 Benchmark concentrations (BMCs)**

288 Benchmark concentrations (BMCs) were calculated for every outcome measure and chemical to  
289 quantify potency using the Rcurvep R package (Hsieh et al., 2019). Data for the different worm types  
290 (adult and regenerating) and for each day were treated independently. First, the outcome measures  
291 were transformed into an amenable format to allow for determination of directional, concentration-  
292 dependent responses. For all binary endpoints (lethality, body shape, stickiness, scrunching and eye  
293 regeneration), the incidence rates (number of planarians affected and total number of planarians)  
294 from the combined data from all replicates ( $n \geq 24$ ) was used (Table 2). Normalizing by the vehicle  
295 control response was not necessary for lethality, body shape and eye regeneration as the control  
296 response rate was generally 0 (Supplementary Figure 2). For stickiness and scrunching, which had a  
297 more variable control response (Supplementary Figure 2), the experimental response was normalized  
298 by the incidence number of the respective in-plate vehicle controls. In some cases, this normalization  
299 led to negative incidence rates in the experimental responses. Because the Rcurvep package cannot  
300 handle negative incidence rates and these values are within the variability of the control populations,  
301 we only considered increases in abnormal activity. Thus, these negative incidence rates were set to 0.  
302 For continuous endpoints, the raw response of each individual planarian was normalized either by  
303 dividing by or subtracting by the median of vehicle control values for that plate (Table 3).  
304 Histograms of the normalized control responses for all continuous endpoints are shown in  
305 Supplementary Figures 3 and 4. As appropriate, the normalized outcome measures were multiplied  
306 by 100 to represent the percent change from the control populations and to provide an appropriate  
307 range to perform the BMC analysis. This was done for all endpoints, except for the locomotor bursts  
308 endpoints, where no scaling factor was used. The normalized data were used as input for the Rcurvep  
309 package, which can calculate an appropriate threshold level – benchmark response (BMR) – at which  
310 to define a significant deviation from noise levels (Hsieh et al., 2019). For all endpoints except the  
311 locomotor burst endpoints, the BMR was calculated by testing thresholds from 5-95 in steps of 5 and  
312 by bootstrapping  $n=100$  samples. Because of the smaller response range in the locomotor bursts

313 endpoints, the thresholds were tested in steps of 1 and 0.5 for the total and ratio endpoints,  
314 respectively. For endpoints with large variability (resting, speed), the maximum tested threshold was  
315 increased to 150 to ensure a stabilized response. We found that using  $n=100$  provided similar results  
316 to the recommended  $n=1000$  (Supplementary Figure 5) but generated results in a much shorter  
317 amount of time. The recommended BMR was then used to calculate the BMC for each endpoint,  
318 which was performed using  $n=1000$  bootstrapped samples. For day 7 lethality in regenerating  
319 planarians, the variance was already minimized at the starting test threshold of 5, thus we manually  
320 set the BMR to 10. This threshold level corresponds to the level at which significant effects could be  
321 detected by a Fisher exact test. The BMR could not be appropriately calculated for stickiness because  
322 of issues with control variability and because some chemicals had increased stickiness at all test  
323 concentrations. Thus, we used 2.5 SD to manually set the BMR to 50. We also found that for CPF  
324 and dichlorvos, partial lethality at the highest test concentration caused a non-monotonic response  
325 that disagreed with the rest of the curve. For these chemicals, the highest concentration was masked  
326 in the BMC calculation for stickiness. If necessary, data from a replicate run that was inconsistent  
327 with the remaining replicates was excluded. For all outcome measures, we report the median BMCs  
328 calculated from these bootstrapped results. The lower and upper limits (5<sup>th</sup> and 95<sup>th</sup> percentiles,  
329 respectively) of the BMC for each endpoint are listed in Supplemental File 1. Some endpoints can be  
330 affected in both directions (e.g., increases or decreases in speed). For these endpoints, BMRs and  
331 BMCs were calculated for each direction (Table 3).

332

## 333 2.6 Hierarchical clustering

334 To compare the phenotypic signatures of the OPs to those of the mechanistic control compounds, a  
335 “phenotypic barcode” was created for each chemical concentration. These barcodes consisted of a  
336 binarized score for every outcome measure indicating whether the median compiled score for a  
337 concentration was active (beyond the BMR for that outcome measure) or inactive. Note that because  
338 this analysis does not consider concentration-response, this binarization is not meant as definitive hit  
339 identification on the individual outcome level, but rather provided a means to compare phenotypic  
340 patterns. Outcome measures with two possible directions were separated into the positive or negative  
341 direction, resulting in 70 and 71 outcome measures for adult and regenerating planarians,  
342 respectively. The data were then filtered to only keep chemical concentrations with at least one active  
343 outcome measure and outcome measures that had at least one active hit across all chemicals.  
344 Concentrations with 100% lethality were also removed to focus the analysis on sublethal effects.  
345 Hierarchical clustering was performed using binary distance and Ward’s method of clustering  
346 (ward.D2) using pheatmap in R (R Core Team, 2016). The chemicals were separated into 6 clusters  
347 which appeared to have similar phenotypic patterns within each cluster when manually inspected.

348

## 349 2.7 Ellman assays

350 Thirty-six adult planarians were exposed to either 0.5% DMSO or the respective OPs for 12 days  
351 (Table 4). Concentrations were chosen to span the breadth of AChE inhibition, from no inhibition to  
352 complete inhibition, when possible.

353 Planarians were kept in 12-well plates, with 6 planarians per well and a total volume of 1.2 mL of the  
354 test solution to keep the ratio of chemical/planarian consistent with the screening set-up. Any fission  
355 events or planarians from wells with death were excluded from the assay. After exposure, the



356 planarians were washed 3X with IO water and then homogenized in 1% TritonX-100 in PBS as  
357 described in (Hagstrom et al., 2017b, 2018). An Ellman assay (Ellman et al., 1961) was then  
358 performed using an Acetylcholinesterase activity assay kit (Sigma-Aldrich). Absorbance was read at  
359 412 nm every minute for 10 minutes using a VersaMax (Molecular Devices, San Jose, CA)  
360 spectrophotometer. AChE activity was calculated as the rate of change of absorbance per minute  
361 during the linear portion of the reaction. AChE activity was normalized by protein concentration as  
362 determined by a Coomassie (Bradford) protein assay kit (Thermo Scientific, Waltham, MA) and  
363 compared to 0.5% DMSO exposed samples (set at 100% activity). Activity measurements were  
364 performed with at least three technical replicates per condition and at least 2 independent  
365 experiments (biological replicates). The inhibition dose response curves were fit to a log-logistic  
366 equation (setting the lower limit to 0, the upper limit to 100, and using the  $IC_{50}$  as a parameter) using  
367 the drc R package (Ritz et al., 2015). The function ED was then used to obtain the concentration that  
368 caused 80% inhibition ( $IC_{80}$ ).

369

### 370 **3 Results**

#### 371 **3.1 Exposure to the 7 OPs elicits different types of NT/DNT**

372 Adult and regenerating planarians were exposed for 12 days to 10 concentrations each of the 7 OPs  
373 (acephate, chlorpyrifos, diazinon, dichlorvos, malathion, parathion, and profenofos) (Figure 1). To  
374 focus on sublethal effects, the highest test concentrations were chosen to be at or just below lethal  
375 concentrations based on previous data (Zhang et al., 2019a) or preliminary studies (not shown). No  
376 lethality was observed in acephate up to the highest soluble concentration (316  $\mu$ M), thus this was set  
377 as the highest concentration.

378 The toxicity of the different OPs manifested in different ways (Figure 1). Acephate was the least  
379 toxic and caused increased speed (hyperactivity) only at the highest test concentration (316  $\mu$ M) in  
380 adult and regenerating planarians. More speed measures were affected in adults compared to in  
381 regenerating planarians. Parathion also caused few hits. In regenerating planarians, effects were only  
382 seen at lethal concentrations. Only a defect in scrunching was seen at sublethal concentrations of  
383 parathion in adult planarians. In contrast, the remaining 5 OPs showed selective effects in adult and  
384 regenerating planarians with morphological and/or behavioral effects in the absence of lethality.

385 As shown in Figure 2, the endpoints most often affected by OP exposure (at any concentration) were  
386 abnormal body shapes, stickiness, scrunching, and speed in the blue light period. These endpoints  
387 were largely shared by all the OPs, except for parathion and acephate, in both adult and regenerating  
388 planarians. These endpoints were also the most sensitive to detect OP toxicity. Increased stickiness  
389 (on day 7) was the most sensitive BMC for 4 OPs (CPF, diazinon, dichlorvos, and profenofos) in  
390 both adult and regenerating planarians. Abnormal body shapes on day 12 were the most sensitive  
391 BMC for malathion in adult planarians, while decreased speed in the blue light period was the most  
392 sensitive endpoint for regenerating planarians. Scrunching was the most sensitive endpoint for adult  
393 planarians exposed to parathion.

394 Comparing the most sensitive BMC, the potency ranking of the OPs was similar between adult and  
395 regenerating planarians (Supplemental Table 1), except that the ranking of diazinon and CPF were  
396 swapped in the adult and regenerating planarians. Adults were more sensitive to diazinon than CPF,  
397 while regenerating planarians were relatively more sensitive to CPF than diazinon. This change was  
398 due to diazinon having a much higher BMC (lower potency) in regenerating planarians compared to

399 adult planarians, since the potency of CPF was the same in the two worm types. Notably, even  
400 though no differential overall sensitivity was observed with CPF or dichlorvos between the two  
401 worm types, CPF and dichlorvos both affected more/different categories of endpoints in regenerating  
402 versus adult planarians (Figure 2). In contrast, adult planarians were more sensitive to diazinon,  
403 malathion, and profenofos in terms of overall potency and number of endpoint categories affected  
404 compared to regenerating planarians (Supplemental Table 1, Figure 2).

405 Focusing on sublethal concentrations only, in adult planarians, 5 OPs (CPF, dichlorvos, malathion,  
406 profenofos, and diazinon) caused abnormal body shapes, but only 3 of them (diazinon, dichlorvos,  
407 and malathion) also caused abnormal body shapes in regenerating planarians. Contraction was the  
408 primary body shape associated with OP exposure (Figure 3). In addition, adult and regenerating  
409 planarians exposed to dichlorvos exhibited a mixture of contraction, c-shapes and pharynx extrusion  
410 on day 7 and contraction and c-shapes on day 12 (Figure 3). Worms that exhibited pharynx extrusion  
411 on day 7 were dead by day 12, suggesting that pharynx extrusion was an early indicator of systemic  
412 toxicity.

413

### 414 **3.2 AChE inhibition alone cannot explain OP toxicity profiles**

415 Because acetylcholinesterase is a shared target of these OPs, we investigated whether the observed  
416 phenotypic differences in adult planarians could be explained by differences in AChE inhibition.  
417 Ellman assays were performed on adult planarians exposed for 12 days to different concentrations of  
418 the OPs to determine the  $IC_{80}$  (Figure 4, Supplementary Figure 6). We calculated the  $IC_{80}$  because  
419 significant cholinergic toxicity is seen in mammals when AChE inhibition reaches about 80%  
420 (Lionetto et al., 2013; Russom et al., 2014; Voorhees et al., 2017). Comparisons were made to the  
421 most sensitive BMC in adult planarians ( $BMC_{adult}$ ). Significant inhibition was not observed in up to  
422 316  $\mu M$  acephate. For malathion, significant lethality was observed before 80% inhibition could be  
423 reached and the extrapolated  $IC_{80}$  was significantly higher than the lowest  $BMC_{adult}$  (Figure 4). For  
424 dichlorvos, the  $IC_{80}$  was also higher than the most sensitive  $BMC_{adult}$ . For the remaining 4 OPs, the  
425  $IC_{80}$  values were all lower (CPF, profenofos, parathion) or close to (diazinon) the most sensitive  
426  $BMC_{adult}$ . Diazinon and dichlorvos had very similar inhibition profiles but very different toxicity  
427 profiles. Given the differences in observed phenotypic outcomes, this suggests that AChE inhibition  
428 alone cannot explain the manifestation of toxic outcomes (Figure 4). Similarly, no correlation was  
429 observed between OP toxicity and hydrophobicity ( $\log P$ , Figure 4A). Acephate is the only  
430 hydrophilic OP and neither showed significant behavioral effects nor AChE inhibition.

431 To compare results across the OPs, the potency of the 7 OPs was ranked using either the  $BMC_{adult}$  or  
432 the  $IC_{80}$  (Figure 4B). Overall trends were similar when comparing rankings across the two measures  
433 (Spearman's correlation coefficient: 0.82; p-value: 0.03), with diazinon, dichlorvos, and profenofos  
434 being the most potent OPs and acephate and malathion the least potent in both measures. Profenofos,  
435 however, was the most potent OP using AChE inhibition whereas dichlorvos was the most potent  
436 when looking at the most sensitive  $BMC_{adult}$ . CPF and dichlorvos showed higher relative potency  
437 rankings when measured by the most sensitive  $BMC_{adult}$  compared to the  $IC_{80}$ . The potency ranking  
438 found here for day 12 adult  $IC_{80}$  was similar to ranking comparing inhibition rates of planarian  
439 homogenates using the oxons of a subset of the OPs tested here (CPFO, diazoxon, dichlorvos,  
440 paraoxon and malaaxon) (Hagstrom et al., 2017a).

441

### 442 3.3 Comparison of OP toxicity with known effectors of mechanistic pathways

443 To delineate whether certain OPs affect other targets besides AChE, we also screened “mechanistic  
444 control chemicals” known to target pathways that have been implicated in OP DNT. These chemicals  
445 were screened in 5 concentrations each in adult and regenerating planarians and the BMCs were  
446 calculated (Supplementary Figure 7).

447 To determine whether any phenotypic patterns could be discerned in the data, we generated  
448 phenotypic barcodes for each chemical concentration consisting of a binary score (active or inactive)  
449 for each outcome measure. Hierarchical clustering was performed on the binarized phenotypic  
450 barcodes to see whether different chemical concentrations shared phenotypic patterns. We chose to  
451 look at individual concentrations because different toxicities may emerge depending on the  
452 concentration. In both adult (Figure 5) and regenerating (Figure 6) planarians, we identified 6 main  
453 clusters based on their phenotypic patterns. Using the mechanistic control compounds, we then tried  
454 to anchor the phenotypic clusters to potential underlying mechanisms.

455 In adult planarians (Figure 5), several mid-to high range concentrations of diazinon, malathion,  
456 parathion, and CPF were found in cluster 1, indicating locomotion defects. Only high concentrations  
457 of latrunculin A and nocodazole were also found in this cluster. Low to mid-range concentrations of  
458 CPF, diazinon, dichlorvos, malathion, and profenofos were found in cluster 2, which was  
459 characterized by effects in day 7 stickiness. The carbamate AChE inhibitors physostigmine and  
460 aldicarb as well as the nicotinic AChR agonist nicotine were also associated with this cluster. Single  
461 concentrations of various chemicals, including a concentration of parathion, were found in cluster 3,  
462 with specific effects in scrunching only. Cluster 4 affected miscellaneous outcome measures and  
463 contained concentrations of the negative control D-glucitol, three concentrations of acephate, and  
464 single random concentrations of CPF, muscarine, malathion, and dichlorvos. Small subclusters  
465 appear to emerge within this cluster. For example, one of the concentrations of acephate (7) is  
466 associated with hyperactive effects (increased speed) along with one concentration each of nicotine  
467 and cytochalasin D. High concentrations of dichlorvos and malathion were associated with cluster 5,  
468 which was characterized by effects on scrunching and body shape, often with the addition of various  
469 other outcome measures. This cluster also contained the higher concentrations of several cholinergic  
470 compounds (aldicarb, physostigmine, anatoxin-A and nicotine), serotonergic compounds (buspirone,  
471 mianserin, sertraline) and cytoskeletal disrupting compounds (colchicine, latrunculin A), suggesting  
472 this collection of phenotypes may represent convergence of several pathways. Cluster 6 was  
473 indicative of lethality and contained high concentrations of various compounds, including OPs.

474 We observed different clusters of the OPs in regenerating planarians (Figure 6) than in adults (Figure  
475 5). In regenerating planarians (Figure 6), low-to mid-range concentrations of CPF, diazinon,  
476 dichlorvos and profenofos were associated with cluster 1, which also contained low concentrations of  
477 anatoxin-A and was characterized by increased stickiness. Effects on day 12 speed(blue1) and day 12  
478 resting were also associated with this cluster. Mid-range concentrations of diazinon and malathion  
479 were associated with cluster 2, which was characterized by abnormal body shapes on day 7. Low-  
480 range concentrations of dichlorvos and profenofos and higher concentrations of CPF, and diazinon  
481 were associated with cluster 3 and displayed miscellaneous hits in a handful of various outcome  
482 measures. A single concentration of acephate was also found in this cluster. High concentrations of  
483 malathion and diazinon were associated with cluster 5, which was characterized by effects on body  
484 shape and scrunching. This cluster also contained the higher concentrations of several cholinergic  
485 compounds (aldicarb, physostigmine, anatoxin-A), the serotonin receptor agonist mianserin, and the

486 oxidative stress inducer rotenone. Lastly, cluster 6 was associated with lethality and contained the  
487 highest concentrations of CPF and dichlorvos. None of the OPs were associated with cluster 4.

488

## 489 **4 Discussion**

### 490 **4.1 OPs cause distinct toxicity profiles in adult and regenerating planarians**

491 Previous studies have used freshwater planarians to study the effects of OP exposure on survival,  
492 behavior, and regeneration (Levy and Miller, 1978; Villar et al., 1993; Feldhaus et al., 1998; Zhang et  
493 al., 2013; Poirier et al., 2017; Hagstrom et al., 2018). However, these studies have focused only on a  
494 few endpoints and/or compounds and have been largely qualitative. This study investigated the effect  
495 of 7 OPs on adult and regenerating planarians in parallel using multiple quantitative phenotypic  
496 readouts to assay sublethal effects of continuous OP exposure. We found that these 7 OPs had  
497 distinct toxicity profiles in planarians that differed across the OPs and between adult and regenerating  
498 individuals, recapitulating findings in mammalian systems showing that OPs cause a variety of toxic  
499 outcomes (reviewed in (Moser, 1995; Pope, 1999; Voorhees et al., 2017)).

500 In terms of potency, regenerating planarians were overall less sensitive to the OPs. At the tested  
501 concentrations, lethality was only observed for 2 OPs (CPF and parathion) in regenerating planarians,  
502 whereas 4 OPs (CPF, parathion, dichlorvos and profenofos) showed significant lethality in adult  
503 planarians by day 12. This increased lethality in adult versus regenerating planarians was also  
504 observed in the mechanistic control compounds tested here and has been observed for other  
505 chemicals (Hagstrom et al., 2015; Zhang et al., 2019a). Metabolic differences in the two  
506 developmental stages may explain some of the differential sensitivity to chemical exposure. Oxygen  
507 consumption and metabolism are slower in larger planarians than in smaller ones (Hyman, 1919;  
508 Osuma et al., 2018). To ensure similar sizes after amputation of the regenerating group to the adult  
509 group, we amputate larger planarians to generate the regenerating group, thus regenerating planarians  
510 may have slower metabolism. In addition, while it was found that oxygen consumption is not  
511 different between resting intact/adult and regenerating planarians of similar size (Osuma et al., 2018),  
512 oxygen consumption depends on activity levels (Jenkins, 1959) and regenerating planarians are less  
513 mobile during the first 5-7 days after exposure/amputation than adults (Zhang et al., 2019a). It is also  
514 possible that the pharmacokinetics differ between regenerating and adult planarians, resulting in  
515 potentially lower internal doses in regenerating planarians. These differences could be chemical-  
516 specific. Future work characterizing the pharmacokinetics in both developmental stages will be  
517 critical to contextualize results in planarians and for dose comparisons with other species.

518 To prepare for this kind of system comparison of our results, we used BMC analysis, in contrast to  
519 earlier studies that use lowest-observed-effect levels (LOELs), and thus are dependent on the exact  
520 test concentrations. Typically, point-of-departure/BMC analysis has relied on the use of fixed  
521 threshold levels, e.g., 2 or 3 SD, to determine effects. This approach is not always appropriate for  
522 behavioral data that is often not normally distributed. Thus, we utilized the Rcurvep package which  
523 determines the appropriate threshold/BMR based on the actual noise in the data, which had  
524 previously been used with developing zebrafish morphological and behavioral data (Hsieh et al.,  
525 2019). A comparison of SD and BMR values is provided in Tables 2 and 3 and shows that for most  
526 endpoints the BMR is around 2-3 SDs. Of note, this approach assumes a monotonic concentration  
527 response, and thus is not as sensitive to non-monotonic effects, potentially decreasing sensitivity for  
528 some chemicals compared to our previous studies using LOELs (Zhang et al., 2019a). The  
529 hierarchical clustering in Figures 5 and 6 does not take into consideration concentration-response;

530 therefore, non-monotonic hits are observed in these phenotypic profiles that were not detected by the  
531 BMC analysis and thus their biological significance is unclear. Determination of the BMRs revealed  
532 a surprising level of phenotypic diversity within the morphologies and behaviors of both control and  
533 chemically-treated planarians evidenced by a large SD/BMR of some endpoints. This variability  
534 suggests that although asexual planarians are considered clonal, there is differential sensitivity to  
535 physical and chemical stimuli. Similar variability in the behavioral response of individual *D.*  
536 *japonica* planarians has previously been reported when planarians were simultaneously exposed to  
537 two stimuli (a chemoattractant and bright light) (Inoue et al., 2015). This phenotypic diversity may  
538 reflect the genetic diversity that has been observed in genes involved in responses to external stimuli,  
539 such as genes associated with “signal transduction” and “defense mechanisms” in asexual *D.*  
540 *japonica* planarians (Nishimura et al., 2015). In contrast to highly in-bred animal models, this genetic  
541 diversity may be beneficial to more accurately reflect the large amount of variability found in the  
542 diverse human population, where the goal is to protect the most sensitive populations.

543

#### 544 **4.2 AChE inhibition is not predictive of OP toxicity in adult planarians**

545 Comparison of the presence of adverse outcomes (most sensitive  $BMC_{adult}$ ) with AChE inhibition  
546 ( $IC_{80}$ ) demonstrated that significant AChE inhibition on day 12 was not predictive of phenotypic  
547 effects in adult planarians (Figure 4). The OPs showed different relative ranking when comparing  
548  $IC_{80}$ s to the most sensitive  $BMC_{adult}$ . While the  $IC_{80}$  for profenofos was ~3X lower than that of  
549 dichlorvos, the  $BMC_{adult}$  for dichlorvos was 3X lower than that of profenofos. Similarly, the  $IC_{80}$  for  
550 parathion was half of that for CPF, but the most sensitive  $BMC_{adult}$  for CPF was about 4 times lower  
551 than that of parathion. Dichlorvos, malathion and acephate showed phenotypic effects at  
552 concentrations below their  $IC_{80}$ . Diazinon had phenotypic effects emerge at approximately the  $IC_{80}$ ,  
553 whereas effects were only seen above the  $IC_{80}$  for CPF, parathion, and profenofos. For the latter  
554 group, the  $IC_{80}$ s were 4x (CPF) to 23x (profenofos) lower than the respective BMCs. This means that  
555 although AChE is significantly inhibited at low concentrations, morphological or behavioral effects  
556 were not observed.

557 In humans, 50-60% AChE inhibition produces mild symptoms, 60-90% inhibition produces moderate  
558 symptoms, and >90% inhibition causes death due to respiratory or heart failure (Lionetto et al.,  
559 2013). Since planarians lack target organs such as lungs and a heart, it is possible that even >90%  
560 inhibition does not cause death as rapidly as in humans. Similar trends showing no correlation  
561 between AChE inhibition and lethality has also been shown in nematodes (Rajini et al., 2008).  
562 However, some phenotypic effects would still be expected at these high levels of inhibition. The fact  
563 that we were able to achieve complete loss of AChE activity (within the detection limit of our assay)  
564 with CPF, parathion and profenofos in the absence of phenotypic effects suggests that 1) in the  
565 planarian system the enzymatic activity of AChE is not a good biomarker for measuring the adverse  
566 effects of OP exposure, 2) that some effects due to high AChE inhibition only manifest after the day  
567 12 screening, or 3) that planarians have compensatory mechanisms that allow them to adjust to low  
568 dose OP exposure over time. In support of this last idea, we found that stickiness, which is a sensitive  
569 endpoint for cholinergic effects (Hagstrom et al., 2018), was a shared and sensitive endpoint affected  
570 by many of the OPs on day 7. However, stickiness on day 12 was not affected to the same extent and  
571 often had lower sensitivity. We have previously shown that short term (5 day) exposure to  
572 physostigmine and diazinon caused increased stickiness which was not seen in day 12 regenerating  
573 planarians, despite nearly complete inhibition of AChE activity in both worm types (Hagstrom et al.,  
574 2018). In support of this idea that compensatory mechanisms may protect from cholinergic toxicity, it

575 has been shown that compensatory down-regulation of muscarinic and nicotinic ACh receptors  
576 occurs with many OPs, including parathion. This can lead to tolerance of long-term inhibition of  
577 AChE, but tolerance can vary with different OPs (Bushnell et al., 1993; Jett et al., 1993; Dvergsten  
578 and Meeker, 1994; Voorhees et al., 2017; Slotkin et al., 2019). Similarly, compensatory down-  
579 regulation of nicotinic AChRs and morphological remodeling have been shown to occur in the AChE  
580  $-/-$  knockout mouse, which can surprisingly survive until adulthood despite complete loss of AChE  
581 activity (Chatonnet et al., 2003; Adler et al., 2004). Future mechanistic studies will need to evaluate  
582 regulation of receptor gene expression to address these possibilities and link phenotypes to molecular  
583 events.

584

### 585 **4.3 Clustering with mechanistic control chemicals contextualizes OP toxicity profiles**

586 Comparison of the phenotypic profiles of the different OPs with those of the mechanistic control  
587 compounds was used to parse out effects on cholinergic and non-cholinergic targets. As expected,  
588 some of the phenotypic outcomes were shared by many of the OPs, reflecting their shared action on  
589 AChE. Four OPs (profenofos, CPF, diazinon, and dichlorvos) caused increased stickiness at day 7,  
590 which were also found with exposure to the carbamates aldicarb and physostigmine (Figure 5 cluster  
591 2, Figure 6 cluster 1). None of the other control compounds caused increased stickiness, together  
592 suggesting increased stickiness may be a sensitive, specific cholinergic effect. We have shown that  
593 increased stickiness is correlated with increased mucus secretion (Malinowski et al., 2017). Increased  
594 secretions (including bronchial, lacrimal, salivary, sweat, and intestinal secretions) are a major  
595 hallmark of acute cholinergic toxicity due to stimulation of muscarinic AChRs (Pope et al., 2005b;  
596 Peter et al., 2014; Taylor, 2018).

597 Defects in scrunching – a musculature-driven gait (Cochet-Escartin et al., 2015) - may also be an  
598 indicator of cholinergic toxicity, possibly through effects on nicotinic receptors which are known to  
599 regulate motor functions. We previously found that scrunching defects were correlated with AChE  
600 inhibition in organophosphorus flame retardants (Zhang et al., 2019b). In the current screen, we  
601 observed the inclusion of scrunching in clusters 2 and 6 (adult) and 5 and 6 (regenerating) which  
602 contained medium to high concentrations of dichlorvos, profenofos, and malathion in adults and  
603 diazinon, CPF, and malathion in regenerating planarians, as well as compounds such as aldicarb,  
604 nicotine, physostigmine and anatoxin-A. Notably, these clusters also contained chemicals targeting  
605 the serotonergic pathway (mianserin, sertraline, fluoxetine). Modulation of cholinergic signaling by  
606 serotonin has been supported by several studies (Cassel and Jeltsch, 1995), and CPF and diazinon  
607 have been shown to directly target the serotonin receptors in rodents (Slotkin et al., 2006b, 2019).  
608 Uncovering whether and how these OPs modulate serotonergic signaling in planarians would be an  
609 interesting next step to investigate.

610 Scrunching involves many steps from the initial noxious heat sensation to the stereotypical muscle-  
611 driven periodic body length oscillations. While our previous work has begun to delineate the sensing  
612 mechanisms controlling scrunching in response to diverse physical (e.g., amputation, ultraviolet  
613 light) and chemical stimuli (e.g., allyl isothiocyanate, 1% ethanol) (Cochet-Escartin et al., 2015,  
614 2016; Sabry et al., 2019, 2020), we do not yet know what controls scrunching in response to noxious  
615 heat. Given that scrunching (in contrast to the default planarian gliding gait which is ciliary driven  
616 (Rompolas et al., 2013)) requires coordinated muscle movement (Cochet-Escartin et al., 2015), it is  
617 conceivable that it depends on cholinergic signaling. Additionally, we have shown that susceptibility  
618 to heat is affected in short-term exposure to diazinon and physostigmine as well as when planarian

619 cholinesterase is knocked down via RNA interference (Hagstrom et al., 2018). Thus, heat sensation  
620 could also be affected, with or without impairment of the scrunching motion. Adult AChE -/  
621 knockout mice exhibit decreased pain perception (Duysen et al., 2002). Transient receptor potential  
622 (TRP) channels are important for sensing many noxious and painful stimuli and we have shown that  
623 several TRP channels are important for inducing scrunching in response to specific stimuli (Sabry et  
624 al., 2019). Thus, we speculate that effects on noxious heat sensation in planarians may be a result of  
625 downstream effects on TRP channels, though which specific family are responsible remains to be  
626 determined. To delineate whether OPs cause defects in heat sensation and/or in scrunching execution,  
627 low-throughput mechanistic studies using other scrunching inducers, such as amputation (Cochet-  
628 Escartin et al., 2015) will be necessary. Given the complexity of the scrunching pathway, it is  
629 expected that not all scrunching defects are specific to cholinergic toxicity. Indeed, cluster 3 (adults)  
630 and cluster 4 (regenerating) included various compounds that only affected scrunching (with the  
631 exception of nicotine in regenerating planarians in cluster 4), indicating that multiple pathways  
632 converge to cause scrunching defects.

633 CPF, diazinon, dichlorvos, malathion and profenofos all induced abnormal body shapes in adult  
634 planarians at sublethal concentrations. Except for CPF and profenofos, these OPs also induced  
635 sublethal abnormal body shapes in regenerating planarians. The primary body shape observed was  
636 contraction, with dichlorvos also exhibiting a mix of contraction and c-shapes. The nicotinic AChR  
637 agonist anatoxin-A also induced a severe contracted phenotype, while a mixture of contracted and c-  
638 shape phenotypes was observed in adult and regenerating planarians exposed to aldicarb,  
639 physostigmine and nicotine (Supplementary Figure 8). Previous studies have observed increased C-  
640 shape hyperkinesia in planarians after acute exposure to nicotine (Rawls et al., 2011). Contraction  
641 and our joint classification of contracted/c-shape are equivalent to the “walnut” and “bridge-like”  
642 body shapes that have previously been shown to be induced by nicotine and physostigmine,  
643 respectively, in the planarian *Dugesia gonocephala* (Buttarelli et al., 2000). In *D. japonica*,  
644 physostigmine-induced contraction was shown to be a result of contraction of the body-wall muscles  
645 and that these contractions were delayed by preincubation with the muscle nicotinic AChR antagonist  
646 tubocurarine or the muscarinic AChR antagonist atropine (Nishimura et al., 2010). Together, these  
647 findings suggest that these contracted body shapes may be indicative of cholinergic toxicity.

648 Looking at the OPs individually in more detail, we observed that profenofos caused few additional  
649 effects at sublethal concentrations, suggesting that cholinergic toxicity is the most sensitive effect for  
650 profenofos in planarians, similar to findings in other systems (Levy and Perron, 2016). In contrast,  
651 CPF, dichlorvos and diazinon affected multiple different endpoints in adult and regenerating  
652 planarians. We observed phenotypic effects of CPF only at concentrations at which planarian AChE  
653 was also significantly inhibited, which may suggest that AChE inhibition drives the toxicity profile  
654 of CPF in planarians. However, while adult and regenerating worms had the same lowest BMC, they  
655 exhibited different phenotypic profiles, implying that CPF must affect additional different targets in  
656 the two developmental stages concurrently with significant AChE inhibition. Similarly, in developing  
657 zebrafish, it was found that behavioral defects induced by CPFO were caused by issues with axonal  
658 outgrowth and neuronal activity, but only at concentrations of significant AChE inhibition (Yang et  
659 al., 2011). In a previous screen (Zhang et al., 2019a), we found that the LOEL for CPF was lower in  
660 regenerating planarians (10  $\mu$ M) than in adults (100  $\mu$ M). In the present screen, we do not see that  
661 potency difference when considering all outcome measures collectively, as  
662  $\log_{10}(\text{BMC}_{\text{adult}}/\text{BMC}_{\text{regenerating}})$  is zero. However, the previous screen did not evaluate stickiness,  
663 which we found to be the most sensitive endpoint for CPF in both worm types with a BMC of 1.7  
664  $\mu$ M. Furthermore, when looking at an individual outcome-level, developmental selectivity was

665 observed, because certain outcomes (e.g., scrunching) were only affected in regenerating but not  
666 adult planarians, consistent with previous results (Zhang et al., 2019a).

667 A similar trend was observed for dichlorvos, where overall sensitivity was the same in the two  
668 developmental stages, but a greater breadth of endpoints was affected in regenerating planarians.  
669 Dichlorvos was the most potent OP in adult and regenerating planarians. In adults, phenotypic effects  
670 were present at concentrations below the  $IC_{80}$ . Dichlorvos does not require bioactivation to inhibit  
671 AChE and thus may be fast acting. Nematodes have also been shown to be very sensitive to  
672 dichlorvos (Cole et al., 2004) and dichlorvos is a useful anthelmintic (Chavarría et al., 1969),  
673 suggesting that worms may be especially sensitive to this OP. Dichlorvos was the only OP that  
674 induced a multitude of different body shapes at higher concentrations, including contraction, c-  
675 shapes, and pharynx extrusion. Pharmacological studies in planarians have suggested that the  
676 disruption of specific neurotransmitter systems leads to stereotypical body shapes. For example,  
677 drugs that activate cholinergic signalling induce fixed postures such as contraction while drugs that  
678 activate dopamine signalling produce screw-like hyperkinesia (Buttarelli et al., 2000, 2008). Thus,  
679 compounds that can target multiple neurotransmitter systems may show mixed phenotypes.  
680 Additionally, the manifestation of different body shapes can progress with increasing concentrations.  
681 For example, at lower concentrations dichlorvos primarily induced contractions, similar to the other  
682 OPs, but at higher concentrations, the body shapes also consisted of c-shapes, mixed contraction/c-  
683 shapes akin to “bridge-like hypokinesia” (Buttarelli et al., 2000) and pharynx extrusion. Since c-  
684 shapes have also been observed after acute exposure to nicotine (Rawls et al., 2011), to D2 dopamine  
685 receptors agonists (Venturini et al., 1989), or to the biocide methylisothiazolinone (Van Huizen et al.,  
686 2017), it is unclear whether this progression of shapes represents increased cholinergic toxicity or  
687 potentially effects on different targets that only manifest at higher concentrations. Unlike the distinct  
688 postures like contraction and c-shapes which seem to represent disrupted neurotransmission and are  
689 often reversible (Buttarelli et al., 2008), pharynx extrusion is a morphological change that may be an  
690 early indicator of systemic toxicity. In support of this idea, planarians that exhibited pharynx  
691 extrusion on day 7 were dead by day 12. Thus, classification of abnormal planarian body shapes and  
692 morphologies provides insight into the types of toxicity observed, but further work is needed to  
693 connect effects on specific neurotransmitter systems to specific morphologies.

694 In contrast to CPF and dichlorvos, adult planarians were much more sensitive to diazinon than  
695 regenerating planarians, as the lowest  $BMC_{adult}$  was 42X lower than the lowest  $BMC_{regenerating}$ . This  
696 difference was largely driven by effects on day 7 stickiness in adults, which was over an order of  
697 magnitude lower than the next most sensitive outcome (0.2  $\mu$ M compared to 4.8  $\mu$ M). Moreover, in  
698 adult worms, diazinon was associated with cholinergic toxicity and extreme locomotor defects, which  
699 may be indicative of systemic toxicity. Systemic toxicity was not found in diazinon-exposed  
700 regenerating planarians at the tested concentrations. While the effects in adult planarians were similar  
701 in CPF-exposed and diazinon-exposed planarians, regenerating planarians were less sensitive to  
702 diazinon than to CPF, both in terms of overall potency and in the number of outcomes affected.  
703 Regenerating planarians exposed to diazinon primarily only showed effects on the cholinergic-related  
704 endpoints (stickiness, body shape, and scrunching). It will be interesting to delineate in future work  
705 why regenerating planarians are more resistant to diazinon than adults.

706 For malathion, effects on body shape and scrunching were among the most sensitive endpoints.  
707 Malathion was unable to cause >75% inhibition of planarian AChE without lethality, suggesting that  
708 malathion may affect alternative targets more strongly than AChE in planarians. Unlike the previous  
709 OPs, we also did not observe any effects on stickiness with malathion. In embryos of *Xenopus laevis*  
710 frogs, malathion has been shown to bind with high affinity to lysyl oxidase, causing post-translational



711 modification of collagen and developmental defects (Snawder and Chambers, 1993). Malathion has  
712 also been reported to inhibit lysyl hydroxylase in rat cell culture (Samimi and Last, 2001) and cause  
713 oxidative damage in rat brain regions (Fortunato et al., 2006). Absence of significant AChE  
714 inhibition and cholinergic toxicity when exposed to chronic low doses of malathion has also been  
715 reported in rodents and behavioral effects (e.g., memory impairment) have been attributed to  
716 alternative effects, such as mitochondrial dysfunction (Trevisan et al., 2008; dos Santos et al., 2016).  
717 In regenerating planarians, malathion was associated with cluster 5 which also contained two  
718 concentrations of rotenone, a mitochondrial disruptor which leads to increased oxidative stress. Both  
719 compounds induced abnormal body shapes and disrupted scrunching.

720 The remaining two OPs – acephate and parathion - caused strikingly different toxic outcomes.  
721 Acephate, a phosphoramidate, was the least toxic of all the OPs tested. We only observed hyperactive  
722 behavior at the highest test concentration. Acephate is highly water soluble (negative logP; Figure 4)  
723 and thus may not easily pass through the planarian epithelium, potentially explaining why it caused  
724 few effects. Interestingly, acephate has also been reported to cause hyperactivity in developing  
725 zebrafish at 0.1 mg/L concentration (Liu et al., 2018), indicating that there may be a conserved  
726 mechanism. Hyperactive effects were also observed in adult planarians exposed to 316  $\mu$ M nicotine,  
727 which closely clustered with acephate (Figure 5, cluster 4). Low concentrations of nicotine have  
728 previously been shown to induce hyperactivity and seizure-like motion in planarians (Rawls et al.,  
729 2011; Pagán et al., 2015), similar to effects observed in rodents (Zhu et al., 2012). Moreover,  
730 acephate proved to be a weak planarian AChE inhibitor as no significant AChE inhibition was  
731 observed within the solubility limit of acephate. In humans, acephate also shows weak toxicity,  
732 requiring high concentrations to achieve significant AChE inhibition (Ando and Wakamatsu, 1982).

733 In contrast, we found that parathion was a potent planarian AChE inhibitor and caused lethality in  
734 adult and regenerating planarians in the absence of phenotypes at sublethal concentrations, except for  
735 scrunching in adult planarians. A similar toxicity profile for parathion (lethality before neurotoxic  
736 effects could be detected) has been observed in neonatal rats when treated subcutaneously with  
737 parathion (Slotkin et al., 2006a).

738 In summary, this study shows that behavioral HTS in freshwater planarians is a suitable platform to  
739 study OP neurotoxicity and DNT. Bioactivation of OPs occurs at all stages of development in  
740 planarians and our results recapitulate findings from mammalian studies showing that different OPs  
741 cause different toxicity profiles that cannot be explained by AChE inhibition alone. Adverse  
742 outcomes differ between adult and developing organisms due to the OPs' effects on multiple targets.  
743 Thus, this work emphasizes the need for more comparative studies across developmental stages to  
744 better understand how different OPs – alone or in combination, as in real life applications – damage  
745 the nervous system. The screen presented here is a first step in delineating the different neurotoxic  
746 outcomes induced by OP exposure in planarians. The phenotypic clusters that we identified can be  
747 used as a starting point for future mechanistic studies of OP neurotoxicity in planarians. Using  
748 targeted chemical and genetic (RNAi) screening to manipulate the proposed pathways connected to a  
749 specific OP or phenotype will allow for determination of whether this pathway mitigates the  
750 observed effects. Such an approach has been successfully used to show that activation of D1 but not  
751 D2 dopamine receptors are involved in planarian screw-like hyperkinesia, whereas D2 but not D1  
752 receptors are involved in inducing c-shapes (Venturini et al., 1989). Proteomics and/or RNA-seq  
753 studies would be useful to complement targeted screens to verify the targets and pathways affected  
754 by different OPs in planarians. The unique strengths of planarian HTS – the ability to directly  
755 compare the toxic outcomes of adult and developing animals using the same assays and metrics –

756 make this type of mechanistic analysis particularly powerful, as it would allow for direct connections  
757 to be made between molecular targets and adverse outcomes across different developmental stages.

758

## 759 **5 Conflict of Interest**

760 EMC is the founder of Inveritek, LLC, which offers planarian HTS commercially. The remaining  
761 authors declare that the research was conducted in the absence of any commercial or financial  
762 relationships that could be construed as a potential conflict of interest.

## 763 **6 Author Contributions**

764 DI contributed to experimental design, performed screening experiments, Ellman assays, data  
765 analysis and interpretation, and graphical representation. SQ co-maintained the screening platform,  
766 performed screening experiments and data analysis. VB assisted with data analysis under the  
767 supervision of DI and contributed to planarian maintenance. JHH assisted with BMC analysis in R.  
768 ZM co-maintained the screening platform and assisted with screening. CR assisted with screening,  
769 performed Ellman assays, and maintained planarian laboratory stocks. EMC contributed to  
770 experimental design and coordination of the experiments, performed screening experiments and  
771 contributed to data analysis and interpretation. DI and EMC wrote the first draft of the manuscript.  
772 All authors contributed to the final version of the manuscript.

## 773 **7 Funding**

774 Research reported in this publication was supported by the National Institute of Environmental  
775 Health Sciences of the National Institutes of Health under Award Number R15ES031354 (to  
776 E.M.S.C). V.B. was supported by the Lang Center Engaged Scholarship for undergraduate summer  
777 research. The content is solely the responsibility of the authors and does not necessarily represent the  
778 official views of the National Institutes of Health.

## 779 **8 Acknowledgments**

780 The authors thank Dr. Pamela Lein and Dr. Theodor Slotkin for discussions and Dr. Cynthia Rider  
781 for comments on the manuscript.

## 782 **9 Data Availability Statement**

783 The datasets generated for this study can be found in the Dryad Digital Repository :  
784 <https://doi.org/10.5061/dryad.hdr7sqvkr>.

## 785 **10 References**

786 Adler, M., Manley, H. A., Purcell, A. L., Deshpande, S. S., Hamilton, T. A., Kan, R. K., et al. (2004).  
787 Reduced acetylcholine receptor density, morphological remodeling, and butyrylcholinesterase  
788 activity can sustain muscle function in acetylcholinesterase knockout mice. *Muscle Nerve* 30,  
789 317–27. doi:10.1002/mus.20099.

790 Akiyama, Y., Agata, K., and Inoue, T. (2015). Spontaneous behaviors and wall-curvature lead to  
791 apparent wall preference in planarian. *PLoS One* 10, e0142214. Available at:

- 792 <https://journals.plos.org/plosone/article?id=10.1371/journal.pone.0142214> [Accessed January  
793 11, 2019].
- 794 Aldridge, J. E., Levin, E. D., Seidler, F. J., and Slotkin, T. A. (2005). Developmental exposure of rats  
795 to chlorpyrifos leads to behavioral alterations in adulthood, involving serotonergic mechanisms  
796 and resembling animal models of depression. *Environ. Health Perspect.* 113, 527–31.  
797 doi:10.1289/EHP.7867.
- 798 Ando, M., and Wakamatsu, K. (1982). Inhibitory effect of acephate (N-acetyl O, S-dimethyl  
799 thiophosphoramidate) on serum cholinesterase--effect of acephate on cholinesterase. *J. Toxicol.*  
800 *Sci.* 7, 185–192. doi:10.2131/JTS.7.185.
- 801 Atwood, D., and Paisley-Jones, C. (2017). Pesticides Industry Sales and Usage 2008 - 2012 Market  
802 Estimates. Washington, DC Available at: [https://www.epa.gov/sites/production/files/2017-](https://www.epa.gov/sites/production/files/2017-01/documents/pesticides-industry-sales-usage-2016_0.pdf)  
803 [01/documents/pesticides-industry-sales-usage-2016\\_0.pdf](https://www.epa.gov/sites/production/files/2017-01/documents/pesticides-industry-sales-usage-2016_0.pdf) [Accessed September 10, 2017].
- 804 Birkholz, T. R., and Beane, W. S. (2017). The planarian TRPA1 homolog mediates extraocular  
805 behavioral responses to near-ultraviolet light. *J. Exp. Biol.* 220, 2616–2625.  
806 doi:10.1242/jeb.152298.
- 807 Brown, D. D. R., and Pearson, B. J. (2015). “One FISH, dFISH, three FISH: sensitive methods of  
808 whole-mount fluorescent in situ hybridization in freshwater planarians,” in *In Situ Hybridization*  
809 *Methods*, ed. G. Hauptmann (New York: Springer Science), 127–150. doi:10.1007/978-1-4939-  
810 2303-8.
- 811 Brown, H. M., Ito, H., and Ogden, T. E. (1968). Spectral sensitivity of the planarian ocellus. *J. Gen.*  
812 *Physiol.* 51, 255. doi:10.1085/JGP.51.2.255.
- 813 Burke, R. D., Todd, S. W., Lumsden, E., Mullins, R. J., Mamczarz, J., Fawcett, W. P., et al. (2017).  
814 Developmental neurotoxicity of the organophosphorus insecticide chlorpyrifos: from clinical  
815 findings to preclinical models and potential mechanisms. *J. Neurochem.* 142, 162–177.  
816 doi:10.1111/jnc.14077.
- 817 Bushnell, P. J., Pope, C. N., and Padilla, S. (1993). Behavioral and neurochemical effects of acute  
818 chlorpyrifos in rats: tolerance to prolonged inhibition of cholinesterase. *J. Pharmacol. Exp.*  
819 *Ther.* 266.
- 820 Buttarelli, F. R., Pellicano, C., and Pontieri, F. E. (2008). Neuropharmacology and behavior in  
821 planarians: Translations to mammals. *Comp. Biochem. Physiol. Part C Toxicol. Pharmacol.*  
822 147, 399–408. doi:10.1016/j.cbpc.2008.01.009.
- 823 Buttarelli, F. R., Pontieri, F. E., Margotta, V., and Palladini, G. (2000). Acetylcholine/dopamine  
824 interaction in planaria. *Comp. Biochem. Physiol. C. Toxicol. Pharmacol.* 125, 225–31.  
825 doi:10.1016/S0742-8413(99)00111-5.
- 826 Buttarelli, F. R., Pontieri, F. E., Margotta, V., and Palladini, G. (2002). Cannabinoid-induced  
827 stimulation of motor activity in planaria through an opioid receptor-mediated mechanism. *Prog.*  
828 *Neuro-Psychopharmacology Biol. Psychiatry* 26, 65–68. doi:10.1016/S0278-5846(01)00230-5.
- 829 Carr, R. L., Graves, C. A., Magnum, L. C., Nail, C. A., and Ross, M. K. (2014). Low level

- 830 chlorpyrifos exposure increases anandamide accumulation in juvenile rat brain in the absence of  
831 brain cholinesterase inhibition. *Neurotoxicology* 43, 82–89. doi:10.1016/J.NEURO.2013.12.009.
- 832 Casida, J. E., and Quistad, G. B. (2004). Organophosphate toxicology: safety aspects of  
833 nonacetylcholinesterase secondary targets. *Chem. Res. Toxicol.* 17, 983–998.  
834 doi:10.1021/TX0499259.
- 835 Cassel, J. C., and Jeltsch, H. (1995). Serotonergic modulation of cholinergic function in the central  
836 nervous system: cognitive implications. *Neuroscience* 69, 1–41. doi:10.1016/0306-  
837 4522(95)00241-A.
- 838 Caughlan, A., Newhouse, K., Namgung, U., and Xia, Z. (2004). Chlorpyrifos induces apoptosis in rat  
839 cortical neurons that is regulated by a balance between p38 and ERK/JNK MAP kinases.  
840 *Toxicol. Sci.* 78, 125–34. doi:10.1093/toxsci/kfh038.
- 841 Cebrià, F. (2007). Regenerating the central nervous system: how easy for planarians! *Dev. Genes  
842 Evol.* 217, 733–48. doi:10.1007/s00427-007-0188-6.
- 843 Chatonnet, F., Boudinot, É., Chatonnet, A., Taysse, L., Daulon, S., Champagnat, J., et al. (2003).  
844 Respiratory survival mechanisms in acetylcholinesterase knockout mouse. *Eur. J. Neurosci.* 18,  
845 1419–1427. doi:10.1046/J.1460-9568.2003.02867.X.
- 846 Chavarría, A. P., Swartzwelder, J. C., Villarejos, V. M., Kotcher, E., and Arguedas, J. (1969).  
847 Dichlorvos, an effective broad-spectrum anthelmintic. *Am. J. Trop. Med. Hyg.* 18, 907–911.  
848 doi:10.4269/ajtmh.1969.18.907.
- 849 Cochet-Escartin, O., Carter, J. A., Chakraverti-Wuerthwein, M., Sinha, J., and Collins, E. M. S.  
850 (2016). Slo1 regulates ethanol-induced scrunching in freshwater planarians. *Phys. Biol.* 13, 1–  
851 12. doi:10.1088/1478-3975/13/5/055001.
- 852 Cochet-Escartin, O., Mickolajczk, K. J., and Collins, E.-M. S. (2015). Scrunching: a novel escape  
853 gait in planarians. *Phys. Biol.* 12, 055001. doi:10.1088/1478-3975/12/5/056010.
- 854 Cole, R. D., Anderson, G. L., and Williams, P. L. (2004). The nematode *Caenorhabditis elegans* as a  
855 model of organophosphate-induced mammalian neurotoxicity. *Toxicol. Appl. Pharmacol.* 194,  
856 248–56. doi:10.1016/j.taap.2003.09.013.
- 857 Costa, L. G. (2018). Organophosphorus compounds at 80: Some old and new issues. *Toxicol. Sci.*  
858 162, 24–35. doi:10.1093/toxsci/kfx266.
- 859 Crumpton, T. L., Seidler, F. J., and Slotkin, T. A. (2000). Is oxidative stress involved in the  
860 developmental neurotoxicity of chlorpyrifos? *Dev. Brain Res.* 121, 189–195.  
861 doi:10.1016/S0165-3806(00)00045-6.
- 862 Dam, K., Seidler, F. J., and Slotkin, T. A. (2000). Chlorpyrifos exposure during a critical neonatal  
863 period elicits gender-selective deficits in the development of coordination skills and locomotor  
864 activity. *Brain Res. Dev. Brain Res.* 121, 179–87. Available at:  
865 <http://www.ncbi.nlm.nih.gov/pubmed/10876030> [Accessed June 8, 2018].
- 866 dos Santos, A. A., Naime, A. A., de Oliveira, J., Colle, D., dos Santos, D. B., Hort, M. A., et al.

- 867 (2016). Long-term and low-dose malathion exposure causes cognitive impairment in adult mice:  
868 evidence of hippocampal mitochondrial dysfunction, astrogliosis and apoptotic events. *Arch.*  
869 *Toxicol.* 90, 647–660. doi:10.1007/S00204-015-1466-0.
- 870 Dunkel, J., Talbot, J., and Schötz, E.-M. (2011). Memory and obesity affect the population dynamics  
871 of asexual freshwater planarians. *Phys. Biol.* 8, 026003. doi:10.1088/1478-3975/8/2/026003.
- 872 Duysen, E. G., Stribley, J. A., Fry, D. L., Hinrichs, S. H., and Lockridge, O. (2002). Rescue of the  
873 acetylcholinesterase knockout mouse by feeding a liquid diet; phenotype of the adult  
874 acetylcholinesterase deficient mouse. *Brain Res. Dev. Brain Res.* 137, 43–54.  
875 doi:10.1016/S0165-3806(02)00367-X.
- 876 Dvergsten, C., and Meeker, R. B. (1994). Muscarinic cholinergic receptor regulation and  
877 acetylcholinesterase inhibition in response to insecticide exposure during development. *Int. J.*  
878 *Dev. Neurosci.* 12, 63–75. doi:10.1016/0736-5748(94)90097-3.
- 879 Ellman, G. L., Courtney, K. D., Andres, V., and Featherstone, R. M. (1961). A new and rapid  
880 colorimetric determination of acetylcholinesterase activity. *Biochem. Pharmacol.* 7, 88–95.  
881 doi:10.1016/0006-2952(61)90145-9.
- 882 EUROSTAT (2016). *Agriculture, forestry and fishery statistics - 2016 edition.* , eds. R. Forti and M.  
883 Henrard Luxembourg, Belgium: European Union doi:10.2785/917017.
- 884 Feldhaus, J. M., Feldhaus, A. J., Ace, L. N., and Pope, C. N. (1998). “Interactive effects of pesticide  
885 mixtures on the neurobehavioral responses and AChE levels of planaria,” in *Environmental*  
886 *Toxicology and Risk Assessment: Seventh Volume, ASTM STP 1333*, eds. E. E. Little, A. J.  
887 DeLonay, and B. M. Greenberg (American Society for Testing and Materials), 140–150.  
888 Available at:  
889 [https://books.google.com/books?id=6EPcVPX7AZ8C&pg=PA147&lpg=PA147&dq=Carbaryl+](https://books.google.com/books?id=6EPcVPX7AZ8C&pg=PA147&lpg=PA147&dq=Carbaryl+planaria&source=bl&ots=5qUNGaWATY&sig=x6DRBpnBCR0aTuTNIWeGTgPEqMo&hl=en&sa=X&ved=0ahUKEwiK6OjJ4-LZAhUM9GMKHao_AJcQ6AEIPzAD#v=onepage&q=Carbaryl%20planaria&f=false)  
890 [planaria&source=bl&ots=5qUNGaWATY&sig=x6DRBpnBCR0aTuTNIWeGTgPEqMo&hl=en](https://books.google.com/books?id=6EPcVPX7AZ8C&pg=PA147&lpg=PA147&dq=Carbaryl+planaria&source=bl&ots=5qUNGaWATY&sig=x6DRBpnBCR0aTuTNIWeGTgPEqMo&hl=en&sa=X&ved=0ahUKEwiK6OjJ4-LZAhUM9GMKHao_AJcQ6AEIPzAD#v=onepage&q=Carbaryl%20planaria&f=false)  
891 [&sa=X&ved=0ahUKEwiK6OjJ4-](https://books.google.com/books?id=6EPcVPX7AZ8C&pg=PA147&lpg=PA147&dq=Carbaryl+planaria&source=bl&ots=5qUNGaWATY&sig=x6DRBpnBCR0aTuTNIWeGTgPEqMo&hl=en&sa=X&ved=0ahUKEwiK6OjJ4-LZAhUM9GMKHao_AJcQ6AEIPzAD#v=onepage&q=Carbaryl%20planaria&f=false)  
892 [LZAhUM9GMKHao\\_AJcQ6AEIPzAD#v=onepage&q=Carbaryl planaria&f=false](https://books.google.com/books?id=6EPcVPX7AZ8C&pg=PA147&lpg=PA147&dq=Carbaryl+planaria&source=bl&ots=5qUNGaWATY&sig=x6DRBpnBCR0aTuTNIWeGTgPEqMo&hl=en&sa=X&ved=0ahUKEwiK6OjJ4-LZAhUM9GMKHao_AJcQ6AEIPzAD#v=onepage&q=Carbaryl%20planaria&f=false) [Accessed  
893 March 10, 2018].
- 894 Flaskos, J. (2012). The developmental neurotoxicity of organophosphorus insecticides: a direct role  
895 for the oxon metabolites. *Toxicol. Lett.* 209, 86–93. doi:10.1016/j.toxlet.2011.11.026.
- 896 Flaskos, J. (2014). The neuronal cytoskeleton as a potential target in the developmental neurotoxicity  
897 of organophosphorothionate insecticides. *Basic Clin. Pharmacol. Toxicol.* 115, 201–8.  
898 doi:10.1111/bcpt.12204.
- 899 Fortunato, J. J., Feier, G., Vitali, A. M., Petronilho, F. C., Dal-Pizzol, F., and Quevedo, J. (2006).  
900 Malathion-induced oxidative stress in rat brain regions. *Neurochem. Res.* 31, 671–678.  
901 doi:10.1007/S11064-006-9065-3/FIGURES/4.
- 902 Gearhart, D. A., Sickles, D. W., Buccafusco, J. J., Prendergast, M. A., and Terry, A. V. (2007).  
903 Chlorpyrifos, chlorpyrifos-oxon, and diisopropylfluorophosphate inhibit kinesin-dependent  
904 microtubule motility. *Toxicol. Appl. Pharmacol.* 218, 20–29. doi:10.1016/J.TAAP.2006.10.008.
- 905 González-Alzaga, B., Lacasaña, M., Aguilar-Garduño, C., Rodríguez-Barranco, M., Ballester, F.,

- 906 Rebagliato, M., et al. (2014). A systematic review of neurodevelopmental effects of prenatal and  
907 postnatal organophosphate pesticide exposure. *Toxicol. Lett.* 230, 104–121.  
908 doi:10.1016/j.toxlet.2013.11.019.
- 909 Grigoryan, H., Schopfer, L. M., Thompson, C. M., Terry, A. V., Masson, P., and Lockridge, O.  
910 (2008). Mass spectrometry identifies covalent binding of soman, sarin, chlorpyrifos oxon,  
911 diisopropyl fluorophosphate, and FP-biotin to tyrosines on tubulin: a potential mechanism of  
912 long term toxicity by organophosphorus agents. *Chem. Biol. Interact.* 175, 180.  
913 doi:10.1016/J.CBI.2008.04.013.
- 914 Gu, Z., Gu, L., Eils, R., Schlesner, M., and Brors, B. (2014). circlize Implements and enhances  
915 circular visualization in R. *Bioinformatics* 30, 2811–2812.  
916 doi:10.1093/BIOINFORMATICS/BTU393.
- 917 Guizzetti, M., Pathak, S., Giordano, G., and Costa, L. G. (2005). Effect of organophosphorus  
918 insecticides and their metabolites on astroglial cell proliferation. *Toxicology* 215, 182–90.  
919 doi:10.1016/j.tox.2005.07.004.
- 920 Hagstrom, D., Cochet-Escartin, O., and Collins, E.-M. S. (2016). Planarian brain regeneration as a  
921 model system for developmental neurotoxicology. *Regeneration* 3, 65–77. doi:10.1002/reg2.52.
- 922 Hagstrom, D., Cochet-Escartin, O., Zhang, S., Khuu, C., and Collins, E.-M. S. (2015). Freshwater  
923 planarians as an alternative animal model for neurotoxicology. *Toxicol. Sci.* 147, 270–285.  
924 doi:10.1093/toxsci/kfv129.
- 925 Hagstrom, D., Hirokawa, H., Zhang, L., Radić, Z., Taylor, P., and Collins, E.-M. S. (2017a).  
926 Planarian cholinesterase: in vitro characterization of an evolutionarily ancient enzyme to study  
927 organophosphorus pesticide toxicity and reactivation. *Arch. Toxicol.* 91, 2837–2847.  
928 doi:10.1007/s00204-016-1908-3.
- 929 Hagstrom, D., Hirokawa, H., Zhang, L., Radić, Z., Taylor, P., and Collins, E.-M. S. (2017b).  
930 Planarian cholinesterase: in vitro characterization of an evolutionarily ancient enzyme to study  
931 organophosphorus pesticide toxicity and reactivation. *Arch. Toxicol.* 91, 2837–2847.  
932 doi:10.1007/s00204-016-1908-3.
- 933 Hagstrom, D., Truong, L., Zhang, S., Tanguay, R., and Collins, E.-M. S. (2019). Comparative  
934 analysis of zebrafish and planarian model systems for developmental neurotoxicity screens  
935 using an 87-compound library. *Toxicol. Sci.* 167, 15–25. doi:10.1093/toxsci/kfy180.
- 936 Hagstrom, D., Zhang, S., Ho, A., Tsai, E. S., Radić, Z., Jahromi, A., et al. (2018). Planarian  
937 cholinesterase: molecular and functional characterization of an evolutionarily ancient enzyme to  
938 study organophosphorus pesticide toxicity. *Arch. Toxicol.* 92, 1161–1176. doi:10.1007/s00204-  
939 017-2130-7.
- 940 Howard, M. D., and Pope, C. N. (2002). In vitro effects of chlorpyrifos, parathion, methyl parathion  
941 and their oxons on cardiac muscarinic receptor binding in neonatal and adult rats. *Toxicology*  
942 170, 1–10. doi:10.1016/S0300-483X(01)00498-X.
- 943 Hsieh, J. H., Ryan, K., Sedykh, A., Lin, J. A., Shapiro, A. J., Parham, F., et al. (2019). Application of  
944 benchmark concentration (BMC) analysis on zebrafish data: A new perspective for quantifying

- 945 toxicity in alternative animal models. *Toxicol. Sci.* 167, 282–292. doi:10.1093/toxsci/kfy258.
- 946 Hyman, L. H. (1919). Physiological studies on Planaria III. Oxygen consumption in relation to age  
947 (size) differences. *Biol. Bull.* 37, 388–403. doi:10.2307/1536374.
- 948 Inoue, T., Hoshino, H., Yamashita, T., Shimoyama, S., and Agata, K. (2015). Planarian shows  
949 decision-making behavior in response to multiple stimuli by integrative brain function. *Zool.*  
950 *Lett.*, 1–7. Available at: [http://zoologicalletters.biomedcentral.com/articles/10.1186/s40851-014-](http://zoologicalletters.biomedcentral.com/articles/10.1186/s40851-014-0010-z)  
951 0010-z [Accessed November 4, 2015].
- 952 Inoue, T., Yamashita, T., and Agata, K. (2014). Thermosensory signaling by TRPM is processed by  
953 brain serotonergic neurons to produce planarian thermotaxis. *J. Neurosci.* 34, 15701–14.  
954 doi:10.1523/JNEUROSCI.5379-13.2014.
- 955 Ireland, D., Bochenek, V., Chaiken, D., Rabeler, C., Onoe, S., Soni, A., et al. (2020). *Dugesia*  
956 *japonica* is the best suited of three planarian species for high-throughput toxicology screening.  
957 *Chemosphere* 253, 126718. doi:10.1016/j.chemosphere.2020.126718.
- 958 Jansen, K. L., Cole, T. B., Park, S. S., Furlong, C. E., and Costa, L. G. (2009). Paraoxonase 1  
959 (PON1) modulates the toxicity of mixed organophosphorus compounds. *Toxicol. Appl.*  
960 *Pharmacol.* 236, 142–53. doi:10.1016/j.taap.2009.02.001.
- 961 Jenkins, M. M. (1959). Respiration rates in Planarians I. The use of the Warburg respirometer in  
962 determining oxygen consumption. *Proc. Okla. Acad. Sci.*, 35–40.
- 963 Jett, D. A., Hill, E. F., Fernando, J. C., Eldefrawi, M. E., and Eldefrawi, A. T. (1993). Down-  
964 regulation of muscarinic receptors and the m3 subtype in white-footed mice by dietary exposure  
965 to parathion. *J. Toxicol. Environ. Health* 39, 395–415. doi:10.1080/15287399309531760.
- 966 Jiang, W., Duysen, E. G., Hansen, H., Shlyakhtenko, L., Schopfer, L. M., and Lockridge, O. (2010).  
967 Mice treated with chlorpyrifos or chlorpyrifos oxon have organophosphorylated tubulin in the  
968 brain and disrupted microtubule structures, suggesting a role for tubulin in neurotoxicity  
969 associated with exposure to organophosphorus agents. *Toxicol. Sci.* 115, 183–193.  
970 doi:10.1093/toxsci/kfq032.
- 971 Kaur, J., and Singh, P. K. (2020). Enzyme-based optical biosensors for organophosphate class of  
972 pesticide detection. *Phys. Chem. Chem. Phys.* 22, 15105–15119. doi:10.1039/D0CP01647K.
- 973 Koenig, J. A., Chen, C. A., and Shih, T. M. (2020). Development of a larval zebrafish model for  
974 acute organophosphorus nerve agent and pesticide exposure and therapeutic evaluation. *Toxics*  
975 8, 1–11. doi:10.3390/toxics8040106.
- 976 Lein, P. J., and Fryer, A. D. (2005). Organophosphorus insecticides induce airway hyperreactivity by  
977 decreasing neuronal M2 muscarinic receptor function independent of acetylcholinesterase  
978 inhibition. *Toxicol. Sci.* 83, 166–176. doi:10.1093/TOXSCI/KFI001.
- 979 Levin, E. D., Swain, H. A., Donerly, S., and Linney, E. (2004). Developmental chlorpyrifos effects  
980 on hatchling zebrafish swimming behavior. *Neurotoxicol. Teratol.* 26, 719–723.  
981 doi:10.1016/j.ntt.2004.06.013.

- 982 Levy, R., and Miller, T. W. (1978). Tolerance of the planarian *Dugesia dorotocephala* to high  
983 concentrations of pesticides and growth regulators. *Entomophaga* 23, 31–34.  
984 doi:10.1007/BF02371988.
- 985 Levy, S. J., and Perron, M. M. (2016). Amendment to: Profenofos: Human Health Draft Risk  
986 Assessment (DRA) for Registration Review.
- 987 Lionetto, M. G., Caricato, R., Calisi, A., Giordano, M. E., and Schettino, T. (2013).  
988 Acetylcholinesterase as a biomarker in environmental and occupational medicine: New insights  
989 and future perspectives. *Biomed Res. Int.* 2013, 1–8. doi:10.1155/2013/321213.
- 990 Liu, J., Parsons, L., and Pope, C. (2013). Comparative effects of parathion and chlorpyrifos on  
991 extracellular endocannabinoid levels in rat hippocampus: Influence on cholinergic toxicity.  
992 *Toxicol. Appl. Pharmacol.* 272, 608–615. doi:10.1016/j.taap.2013.07.025.
- 993 Liu, X. Y., Zhang, Q. P., Li, S. B., Mi, P., Chen, D. Y., Zhao, X., et al. (2018). Developmental  
994 toxicity and neurotoxicity of synthetic organic insecticides in zebrafish (*Danio rerio*): A  
995 comparative study of deltamethrin, acephate, and thiamethoxam. *Chemosphere* 199, 16–25.  
996 doi:10.1016/J.CHEMOSPHERE.2018.01.176.
- 997 Malinowski, P. T., Cochet-Escartin, O., Kaj, K. J., Ronan, E., Groisman, A., Diamond, P. H., et al.  
998 (2017). Mechanics dictate where and how freshwater planarians fission. *Proc. Natl. Acad. Sci.*  
999 *U. S. A.* 114, 10888–10893. doi:10.1073/pnas.1700762114.
- 1000 Mamczarz, J., Pescrille, J. D., Gavrusenko, L., Burke, R. D., Fawcett, W. P., DeTolla, L. J., et al.  
1001 (2016). Spatial learning impairment in prepubertal guinea pigs prenatally exposed to the  
1002 organophosphorus pesticide chlorpyrifos: Toxicological implications. *Neurotoxicology* 56, 17–  
1003 28. doi:10.1016/j.neuro.2016.06.008.
- 1004 Moser, V. C. (1995). Comparisons of the acute effects of cholinesterase inhibitors using a  
1005 neurobehavioral screening battery in rats. *Neurotoxicol. Teratol.* 17, 617–625.  
1006 doi:10.1016/0892-0362(95)02002-0.
- 1007 Muñoz-Quezada, M. T., Lucero, B. A., Barr, D. B., Steenland, K., Levy, K., Ryan, P. B., et al.  
1008 (2013). Neurodevelopmental effects in children associated with exposure to organophosphate  
1009 pesticides: a systematic review. *Neurotoxicology* 39, 158–168. doi:10.1016/j.neuro.2013.09.003.
- 1010 Nishimura, K., Kitamura, Y., Taniguchi, T., and Agata, K. (2010). Analysis of motor function  
1011 modulated by cholinergic neurons in planarian *Dugesia japonica*. *Neuroscience* 168, 18–30.  
1012 doi:10.1016/j.neuroscience.2010.03.038.
- 1013 Nishimura, O., Hosoda, K., Kawaguchi, E., Yazawa, S., Hayashi, T., Inoue, T., et al. (2015).  
1014 Unusually large number of mutations in asexually reproducing clonal planarian *Dugesia*  
1015 *japonica*. *PLoS One* 10, 1–23. doi:10.1371/journal.pone.0143525.
- 1016 Osuma, E. A., Riggs, D. W., Gibb, A. A., and Hill, B. G. (2018). High throughput measurement of  
1017 metabolism in planarians reveals activation of glycolysis during regeneration. *Regeneration* 5,  
1018 78. doi:10.1002/REG2.95.
- 1019 Pagán, O. R. (2014). *The first brain: the neuroscience of planarians*. Oxford University Press.



- 1020 Pagán, O. R., Montgomery, E., Deats, S., Bach, D., and Baker, D. (2015). Evidence of nicotine-  
1021 induced, curare-insensitive, behavior in planarians. *Neurochem. Res.* 40, 2087–2090.  
1022 doi:10.1007/s11064-015-1512-6.
- 1023 Paskin, T. R., Jellies, J., Bacher, J., and Beane, W. S. (2014). Planarian phototactic assay reveals  
1024 differential behavioral responses based on wavelength. *PLoS One* 9, e114708.  
1025 doi:10.1371/journal.pone.0114708.
- 1026 Peeples, E. S., Schopfer, L. M., Duysen, E. G., Spaulding, R., Voelker, T., Thompson, C. M., et al.  
1027 (2005). Albumin, a new biomarker of organophosphorus toxicant exposure, identified by mass  
1028 spectrometry. *Toxicol. Sci.* 83, 303–312. doi:10.1093/TOXSCI/KFI023.
- 1029 Peter, J. V., Sudarsan, T. I., and Moran, J. L. (2014). Clinical features of organophosphate poisoning:  
1030 A review of different classification systems and approaches. *Indian J. Crit. Care Med.* 18, 735.  
1031 doi:10.4103/0972-5229.144017.
- 1032 Poirier, L., Brun, L., Jacquet, P., Lepolard, C., Armstrong, N., Torre, C., et al. (2017). Enzymatic  
1033 degradation of organophosphorus insecticides decreases toxicity in planarians and enhances  
1034 survival. *Sci. Rep.* 7, 15194. doi:10.1038/s41598-017-15209-8.
- 1035 Pope, C., Karanth, S., and Liu, J. (2005a). Pharmacology and toxicology of cholinesterase inhibitors:  
1036 uses and misuses of a common mechanism of action. *Environ. Toxicol. Pharmacol.* 19, 433–46.  
1037 doi:10.1016/j.etap.2004.12.048.
- 1038 Pope, C., Karanth, S., and Liu, J. (2005b). Pharmacology and toxicology of cholinesterase inhibitors:  
1039 uses and misuses of a common mechanism of action. *Environ. Toxicol. Pharmacol.* 19, 433–  
1040 446. doi:10.1016/j.etap.2004.12.048.
- 1041 Pope, C. N. (1999). Organophosphorus pesticides: do they all have the same mechanism of toxicity?  
1042 *J. Toxicol. Environ. Heal. Part B Crit. Rev.* 2, 161–181. doi:10.1080/109374099281205.
- 1043 Prendergast, M. A., Self, R. L., Smith, K. J., Ghayoumi, L., Mullins, M. M., Butler, T. R., et al.  
1044 (2007). Microtubule-associated targets in chlorpyrifos oxon hippocampal neurotoxicity.  
1045 *Neuroscience* 146, 330. doi:10.1016/J.NEUROSCIENCE.2007.01.023.
- 1046 Proskocil, B. J., Bruun, D. A., Thompson, C. M., Fryer, A. D., and Lein, P. J. (2010).  
1047 Organophosphorus pesticides decrease M2 muscarinic receptor function in guinea pig airway  
1048 nerves via indirect mechanisms. *PLoS One* 5, e10562. doi:10.1371/JOURNAL.PONE.0010562.
- 1049 R Core Team (2016). R: A language environment for statistical computing. Vienna, Austria  
1050 Available at: <https://www.r-project.org>.
- 1051 Rajini, P. S., Melstrom, P., and Williams, P. L. (2008). A comparative study on the relationship  
1052 between various toxicological endpoints in *Caenorhabditis elegans* exposed to  
1053 organophosphorus insecticides. *J. Toxicol. Environ. Heal. Part A Curr. Issues* 71, 1043–1050.  
1054 doi:10.1080/15287390801989002.
- 1055 Rauh, V. A., Perera, F. P., Horton, M. K., Whyatt, R. M., Bansal, R., Hao, X., et al. (2012). Brain  
1056 anomalies in children exposed prenatally to a common organophosphate pesticide. *Proc. Natl.*  
1057 *Acad. Sci. U. S. A.* 109, 7871–6. doi:10.1073/pnas.1203396109.

- 1058 Rauh, V., Arunajadai, S., Horton, M., Perera, F., Hoepner, L., Barr, D. B., et al. (2011). Seven-year  
1059 neurodevelopmental scores and prenatal exposure to chlorpyrifos, a common agricultural  
1060 pesticide. *Environ. Health Perspect.* 119, 1196–1201. doi:10.1289/ehp.1003160.
- 1061 Rawls, S. M., Patil, T., Tallarida, C. S., Baron, S., Kim, M., Song, K., et al. (2011). Nicotine  
1062 behavioral pharmacology: Clues from planarians. *Drug Alcohol Depend.* 118, 274–279.  
1063 doi:10.1016/j.drugalcdep.2011.04.001.
- 1064 Razwiedani, L. L., and Rautenbach, P. (2017). Epidemiology of Organophosphate Poisoning in the  
1065 Tshwane District of South Africa. *Environ. Health Insights* 11, 1178630217694149.  
1066 doi:10.1177/1178630217694149.
- 1067 Ribeiro, P., El-Shehabi, F., and Patocka, N. (2005). Classical transmitters and their receptors in  
1068 flatworms. *Parasitology* 131, S19–40. doi:10.1017/S0031182005008565.
- 1069 Richendrfer, H., and Creton, R. (2015). Chlorpyrifos and malathion have opposite effects on  
1070 behaviors and brain size that are not correlated to changes in AChE activity. *Neurotoxicology*  
1071 49, 50–58. doi:10.1016/j.neuro.2015.05.002.
- 1072 Ritz, C., Baty, F., Streibig, J. C., and Gerhard, D. (2015). Dose-response analysis Using R. *PLoS One*  
1073 10, e0146021. doi:10.1371/JOURNAL.PONE.0146021.
- 1074 Rompolas, P., Azimzadeh, J., Marshall, W. F., and King, S. M. (2013). Analysis of ciliary assembly  
1075 and function in planaria. *Methods Enzymol.* 525, 245–264. doi:10.1016/B978-0-12-397944-  
1076 5.00012-2.
- 1077 Ross, K. G., Currie, K. W., Pearson, B. J., and Zayas, R. M. (2017). Nervous system development  
1078 and regeneration in freshwater planarians. *Wiley Interdiscip. Rev. Dev. Biol.* 6, 1–26.  
1079 doi:10.1002/wdev.266.
- 1080 Russom, C. L., LaLone, C. A., Villeneuve, D. L., and Ankley, G. T. (2014). Development of an  
1081 adverse outcome pathway for acetylcholinesterase inhibition leading to acute mortality. *Environ.*  
1082 *Toxicol. Chem.* 33, 2157–2169. doi:10.1002/etc.2662.
- 1083 Sabry, Z., Ho, A., Ireland, D., Rabeler, C., Cochet-Escartin, O., and Collins, E. M. S. (2019).  
1084 Pharmacological or genetic targeting of Transient Receptor Potential (TRP) channels can disrupt  
1085 the planarian escape response. *PLoS One* 14, e0226104. doi:10.1371/journal.pone.0226104.
- 1086 Sabry, Z., Rabeler, C., Ireland, D., Bayingana, K., and Collins, E. M. S. (2020). Planarian scrunching  
1087 as a quantitative behavioral readout for noxious stimuli sensing. *J. Vis. Exp.* 2020, 1–18.  
1088 doi:10.3791/61549.
- 1089 Sagiv, S. K., Kogut, K., Harley, K., Bradman, A., Morga, N., and Eskenazi, B. (2021). Gestational  
1090 exposure to organophosphate pesticides and longitudinally assessed behaviors related to  
1091 Attention-Deficit/Hyperactivity Disorder and executive function. *Am. J. Epidemiol.* 190, 2420–  
1092 2431. doi:10.1093/AJE/KWAB173.
- 1093 Samimi, A., and Last, J. A. (2001). Inhibition of lysyl hydroxylase by malathion and malaoxon.  
1094 *Toxicol. Appl. Pharmacol.* 172, 203–209. doi:10.1006/taap.2001.9147.

- 1095 Schmitt, C., McManus, M., Kumar, N., Awoyemi, O., and Crago, J. (2019). Comparative analyses of  
1096 the neurobehavioral, molecular, and enzymatic effects of organophosphates on embryo-larval  
1097 zebrafish (*Danio rerio*). *Neurotoxicol. Teratol.* 73, 67–75. doi:10.1016/J.NTT.2019.04.002.
- 1098 Shelton, J. F., Geraghty, E. M., Tancredi, D. J., Delwiche, L. D., Schmidt, R. J., Ritz, B., et al.  
1099 (2014). Neurodevelopmental disorders and prenatal residential proximity to agricultural  
1100 pesticides: the CHARGE study. *Environ. Health Perspect.* 122, 1103–9.  
1101 doi:10.1289/ehp.1307044.
- 1102 Shettigar, N., Joshi, A., Dalmeida, R., Gopalkrishna, R., Chakravarthy, A., Patnaik, S., et al. (2017).  
1103 Hierarchies in light sensing and dynamic interactions between ocular and extraocular sensory  
1104 networks in a flatworm. *Sci. Adv.* 3. doi:10.1126/sciadv.1603025.
- 1105 Slotkin, T. A. (2004). Cholinergic systems in brain development and disruption by neurotoxicants:  
1106 nicotine, environmental tobacco smoke, organophosphates. *Toxicol. Appl. Pharmacol.* 198,  
1107 132–51. doi:10.1016/j.taap.2003.06.001.
- 1108 Slotkin, T. A. (2006). “Developmental Neurotoxicity of Organophosphates,” in *Toxicology of*  
1109 *Organophosphate & Carbamate Compounds* (Elsevier), 293–314. doi:10.1016/B978-  
1110 012088523-7/50022-3.
- 1111 Slotkin, T. A., Cousins, M. M., Tate, C. A., and Seidler, F. J. (2001). Persistent cholinergic  
1112 presynaptic deficits after neonatal chlorpyrifos exposure. *Brain Res.* 902, 229–243.  
1113 doi:10.1016/S0006-8993(01)02387-3.
- 1114 Slotkin, T. A., Levin, E. D., and Seidler, F. J. (2006a). Comparative developmental neurotoxicity of  
1115 organophosphate insecticides: Effects on brain development are separable from systemic  
1116 toxicity. *Environ. Health Perspect.* 114, 746–751. doi:10.1289/ehp.8828.
- 1117 Slotkin, T. A., and Seidler, F. J. (2008). Developmental neurotoxicants target neurodifferentiation  
1118 into the serotonin phenotype: Chlorpyrifos, diazinon, dieldrin and divalent nickel. *Toxicol. Appl.*  
1119 *Pharmacol.* 233, 211–219. doi:https://doi.org/10.1016/j.taap.2008.08.020.
- 1120 Slotkin, T. A., Seidler, F. J., and Fumagalli, F. (2007). Exposure to organophosphates reduces the  
1121 expression of neurotrophic factors in neonatal rat brain regions: Similarities and differences in  
1122 the effects of chlorpyrifos and diazinon on the fibroblast growth factor superfamily. *Environ.*  
1123 *Health Perspect.* 115, 909–916. doi:10.1289/EHP.9901.
- 1124 Slotkin, T. A., Skavicus, S., Ko, A., Levin, E. D., and Seidler, F. J. (2019). Perinatal diazinon  
1125 exposure compromises the development of acetylcholine and serotonin systems. *Toxicology*  
1126 424, 152240. doi:10.1016/j.tox.2019.152240.
- 1127 Slotkin, T. A., Skavicus, S., and Seidler, F. J. (2017). Diazinon and parathion diverge in their effects  
1128 on development of noradrenergic systems. *Brain Res. Bull.* 130, 268–273.  
1129 doi:10.1016/J.BRAINRESBULL.2017.02.004.
- 1130 Slotkin, T. A., Tate, C. A., Ryde, I. T., Levin, E. D., and Seidler, F. J. (2006b). Organophosphate  
1131 insecticides target the serotonergic system in developing rat brain regions: disparate effects of  
1132 diazinon and parathion at doses spanning the threshold for cholinesterase inhibition. *Environ.*  
1133 *Health Perspect.* 114, 1542–6. doi:10.1289/EHP.9337.

- 1134 Smulders, C. J. G. M., Bueters, T. J. H., Vailati, S., van Kleef, R. G. D. M., and Vijverberg, H. P.  
1135 M. (2004). Block of neuronal nicotinic acetylcholine receptors by organophosphate insecticides.  
1136 *Toxicol. Sci.* 82, 545–554. doi:10.1093/TOXSCI/KFH269.
- 1137 Snawder, J. E., and Chambers, J. E. (1993). Osteolathrogenic effects of malathion in *Xenopus*  
1138 embryos. *Toxicol. Appl. Pharmacol.* 121, 210–216. doi:10.1006/taap.1993.1147.
- 1139 Song, X., Seidler, F. J., Saleh, J. L., Zhang, J., Padilla, S., and Slotkin, T. A. (1997). Cellular  
1140 mechanisms for developmental toxicity of chlorpyrifos: Targeting the adenylyl cyclase signaling  
1141 cascade. *Toxicol. Appl. Pharmacol.* 145, 158–174. doi:10.1006/taap.1997.8171.
- 1142 Taylor, P. (2018). “Anticholinesterase agents,” in *Goodman and Gilman’s The Pharmacological*  
1143 *Basis of Therapeutics*, ed. Laurence L Brunton (San Francisco: McGraw Hill Education), 163–  
1144 176.
- 1145 Terry, A. V. J. (2012). Functional consequences of repeated organophosphate exposure: potential  
1146 non-cholinergic mechanisms. *Pharmacol. Ther.* 134, 355–65.  
1147 doi:10.1016/j.pharmthera.2012.03.001.
- 1148 Trevisan, R., Uliano-Silva, M., Pandolfo, P., Franco, J. L., Brocardo, P. S., Santos, A. R. S., et al.  
1149 (2008). Antioxidant and acetylcholinesterase response to repeated malathion exposure in rat  
1150 cerebral cortex and hippocampus. *Basic Clin. Pharmacol. Toxicol.* 102, 365–369.  
1151 doi:10.1111/j.1742-7843.2007.00182.x.
- 1152 Van Huizen, A. V, Tseng, A.-S., and Beane, W. S. (2017). Methylisothiazolinone toxicity and  
1153 inhibition of wound healing and regeneration in planaria. *Aquat. Toxicol.* 191, 226–235.  
1154 doi:https://doi.org/10.1016/j.aquatox.2017.08.013.
- 1155 Venturini, G., Stocchi, F., Margotta, V., Ruggieri, S., Bravi, D., Bellantuono, P., et al. (1989). A  
1156 pharmacological study of dopaminergic receptors in planaria. *Neuropharmacology* 28, 1377–  
1157 1382. Available at: <http://www.sciencedirect.com/science/article/pii/0028390889900130>  
1158 [Accessed November 3, 2015].
- 1159 Villar, D., Li, M. H., and Schaeffer, D. J. (1993). Toxicity of organophosphorus pesticides to *Dugesia*  
1160 *dorocephala*. *Bull. Environ. Contam. Toxicol.* 51, 80–87. doi:10.1007/BF00201004.
- 1161 Voorhees, J. R., Rohlman, D. S., Lein, P. J., and Pieper, A. A. (2016). Neurotoxicity in Preclinical  
1162 Models of Occupational Exposure to Organophosphorus Compounds. *Front. Neurosci.* 10, 590.  
1163 doi:10.3389/FNINS.2016.00590.
- 1164 Voorhees, J. R., Rohlman, D. S., Lein, P. J., and Pieper, A. A. (2017). Neurotoxicity in preclinical  
1165 models of occupational exposure to organophosphorus compounds. *Front. Neurosci.* 10, 590.  
1166 doi:10.3389/FNINS.2016.00590.
- 1167 Yang, D., Howard, A., Bruun, D., Ajua-Alemanj, M., Pickart, C., and Lein, P. J. (2008). Chlorpyrifos  
1168 and chlorpyrifos-oxon inhibit axonal growth by interfering with the morphogenic activity of  
1169 acetylcholinesterase. *Toxicol. Appl. Pharmacol.* 228, 32–41. doi:10.1016/j.taap.2007.11.005.
- 1170 Yang, D., Lauridsen, H., Buels, K., Chi, L. H., La Du, J., Bruun, D. A., et al. (2011). Chlorpyrifos-  
1171 oxon disrupts zebrafish axonal growth and motor behavior. *Toxicol. Sci.* 121, 146–159.

1172 doi:10.1093/toxsci/kfr028.

1173 Yen, J., Donerly, S., Linney, E. A., Levin, E. D., and Linney, E. A. (2011). Differential  
1174 acetylcholinesterase inhibition of chlorpyrifos, diazinon and parathion in larval zebrafish.  
1175 *Neurotoxicol. Teratol.* 33, 735–741. doi:10.1016/j.ntt.2011.10.004.

1176 Zarei, M. H., Soodi, M., Qasemian-Lemraski, M., Jafarzadeh, E., and Taha, M. F. (2015). Study of  
1177 the chlorpyrifos neurotoxicity using neural differentiation of adipose tissue-derived stem cells.  
1178 *Environ. Toxicol.* 31, 1510–1519. doi:10.1002/tox.22155.

1179 Zhang, S., Hagstrom, D., Hayes, P., Graham, A., and Collins, E.-M. S. (2019a). Multi-behavioral  
1180 endpoint testing of an 87-chemical compound library in freshwater planarians. *Toxicol. Sci.* 167,  
1181 26–44. doi:10.1093/toxsci/kfy145.

1182 Zhang, S., Ireland, D., Sipes, N. S., Behl, M., and Collins, E.-M. S. (2019b). Screening for neurotoxic  
1183 potential of 15 flame retardants using freshwater planarians. *Neurotoxicol. Teratol.* 73, 54–66.  
1184 doi:10.1016/j.ntt.2019.03.003.

1185 Zhang, X., Tong, H., Bi, S., and Pang, Q. (2013). Effects of chlorpyrifos on acute toxicity, mobility  
1186 and regeneration of planarian *Dugesia Japonica*. *Fresenius Environ. Bull.* 22, 2610–2615.  
1187 Available at:  
1188 [https://www.researchgate.net/publication/286408743\\_Effects\\_of\\_chlorpyrifos\\_on\\_acute\\_toxicit](https://www.researchgate.net/publication/286408743_Effects_of_chlorpyrifos_on_acute_toxicity_mobility_and_regeneration_of_planarian_Dugesia_Japonica)  
1189 [y\\_mobility\\_and\\_regeneration\\_of\\_planarian\\_Dugesia\\_Japonica](https://www.researchgate.net/publication/286408743_Effects_of_chlorpyrifos_on_acute_toxicity_mobility_and_regeneration_of_planarian_Dugesia_Japonica) [Accessed April 26, 2022].

1190 Zhu, J., Zhang, X., Xu, Y., Spencer, T. J., Biederman, J., and Bhide, P. G. (2012). Prenatal nicotine  
1191 exposure mouse model showing hyperactivity, reduced cingulate cortex volume, reduced  
1192 dopamine turnover, and responsiveness to oral methylphenidate treatment. *J. Neurosci.* 32,  
1193 9410–9418. doi:10.1523/JNEUROSCI.1041-12.2012.

1194

1195 **11 Figure Legends**

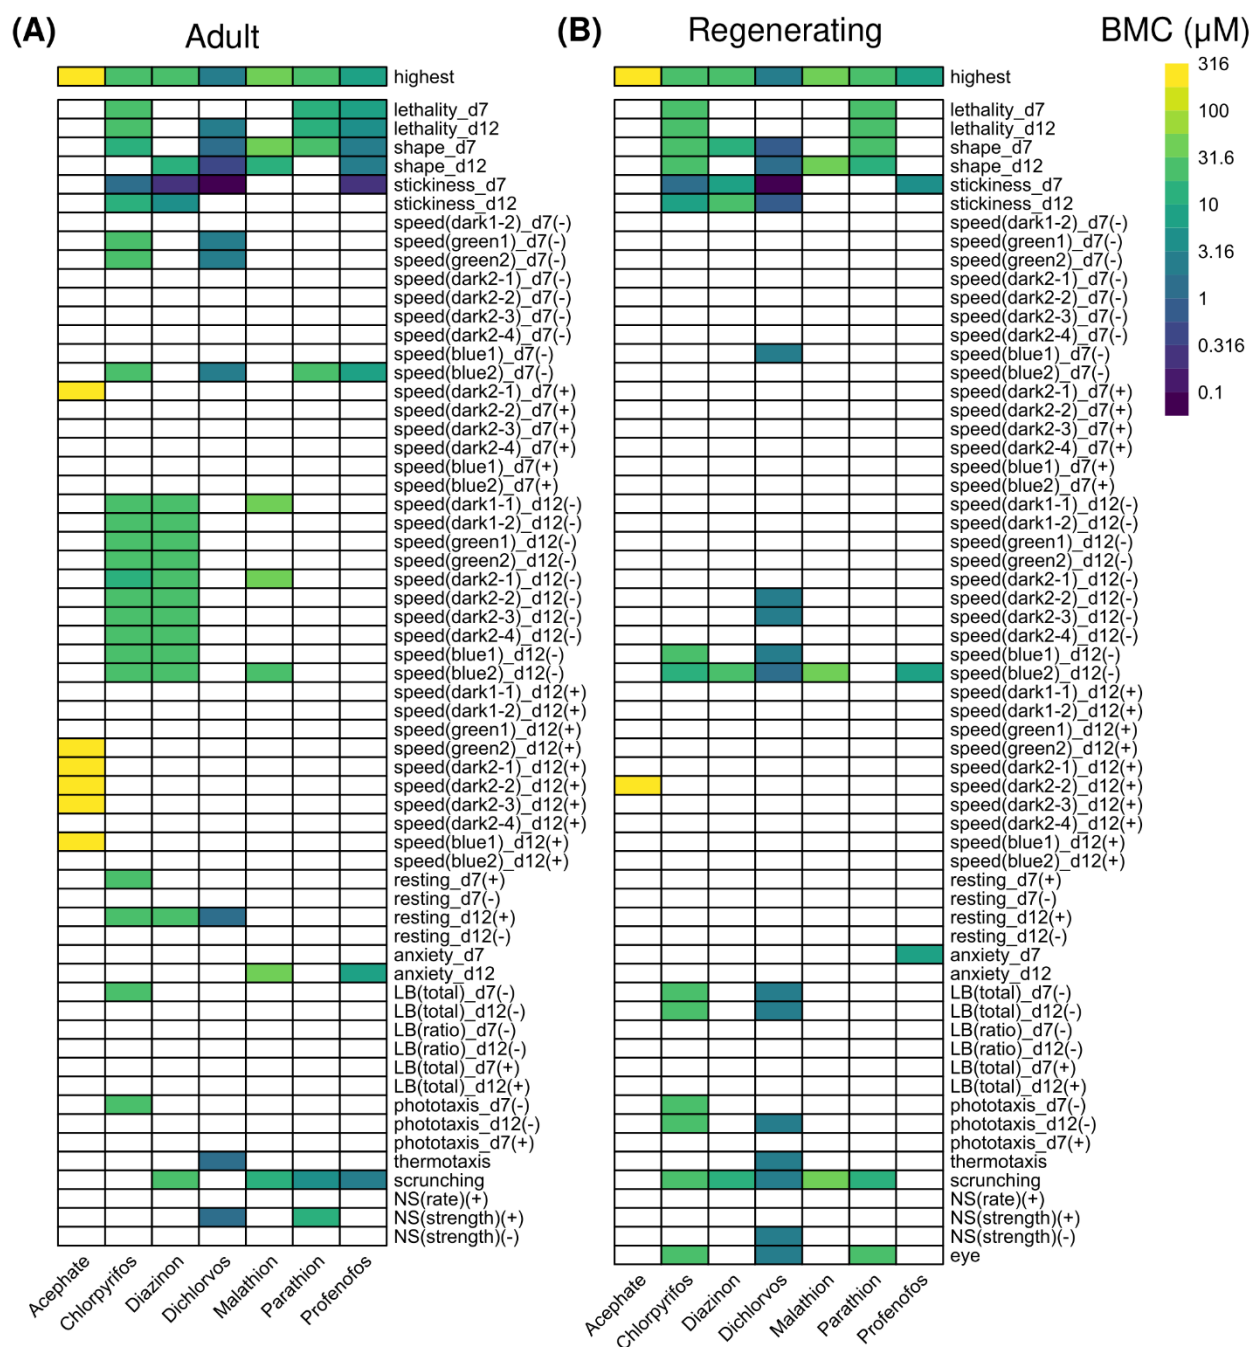

1196

1197 **Figure 1. Comparison of OP toxicity.** Heatmaps comparing the benchmark concentrations (BMCs)  
 1198 for the OPs in adult (A) and regenerating (B) planarians. The first row shows the highest  
 1199 concentration. For outcome measures that can have effects in both directions, the BMCs are  
 1200 separated by either the positive (+) or negative (-) direction. LB: locomotor bursts; NS: noxious  
 1201 stimuli.

## Comparative OP neurotoxicity in planarians

(A)

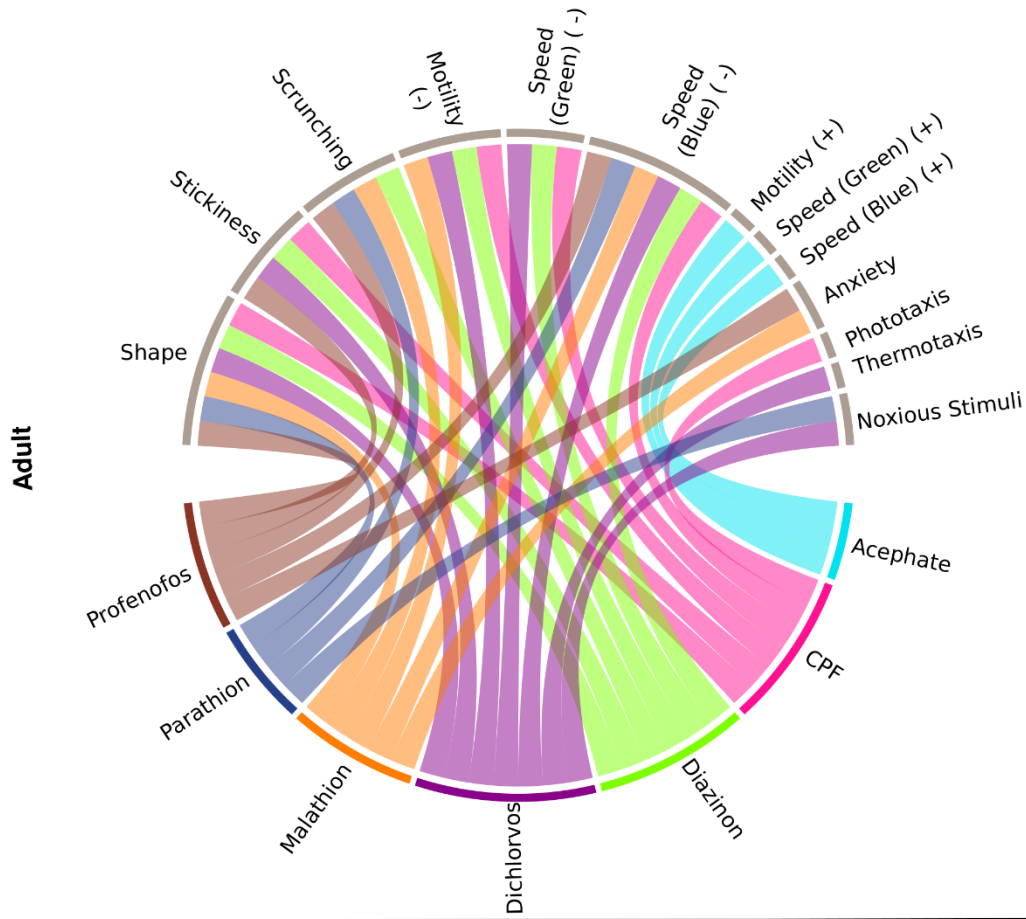

(B)

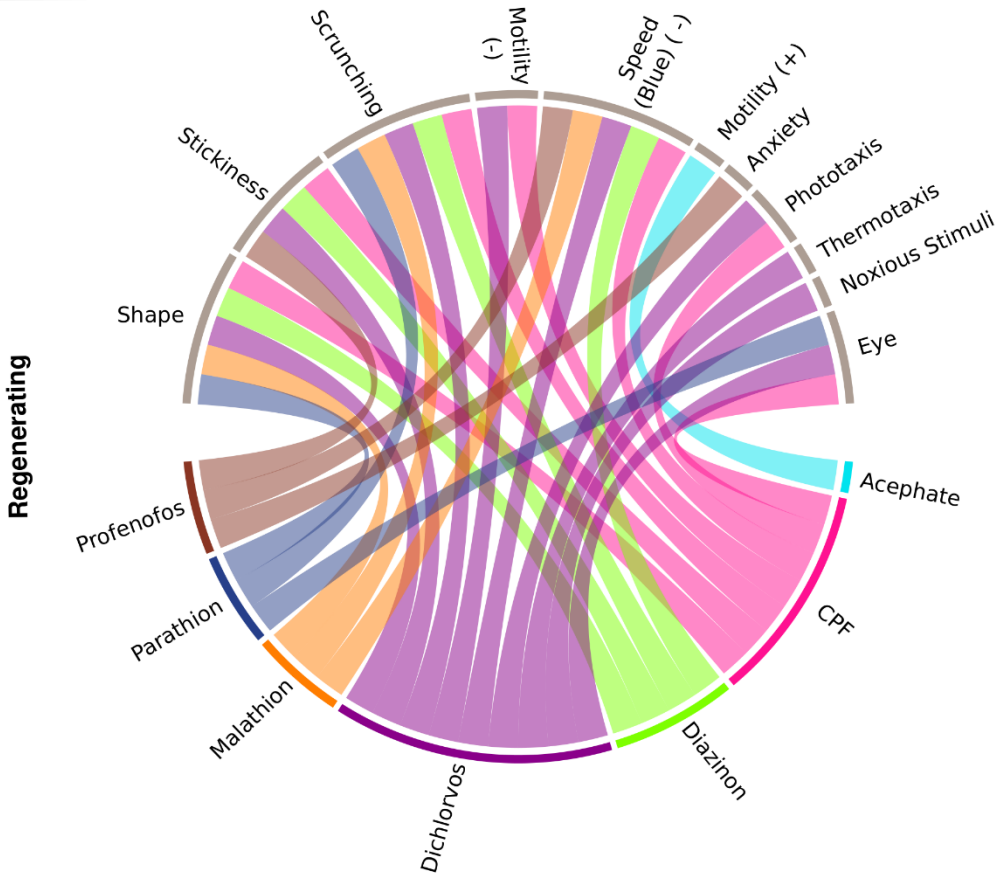

1203 **Figure 2. Connections between individual OPs and classes of endpoints.** Interaction of the 7 OPs  
 1204 with the different endpoint classes for (A) adult and (B) regenerating planarians. Connections were  
 1205 made if the OP caused a hit at either day 7 or 12 at any tested concentration. Effects on speed in the  
 1206 dark period, resting, or locomotor bursts were combined into the “Motility” category. Speed(B):  
 1207 speed in the blue period, Speed(G): speed in the green period, PT: Phototaxis, NS: noxious stimuli.  
 1208 For endpoints that had effects in both directions, the BMCs are separated by either the positive (+)  
 1209 and negative (-) direction.

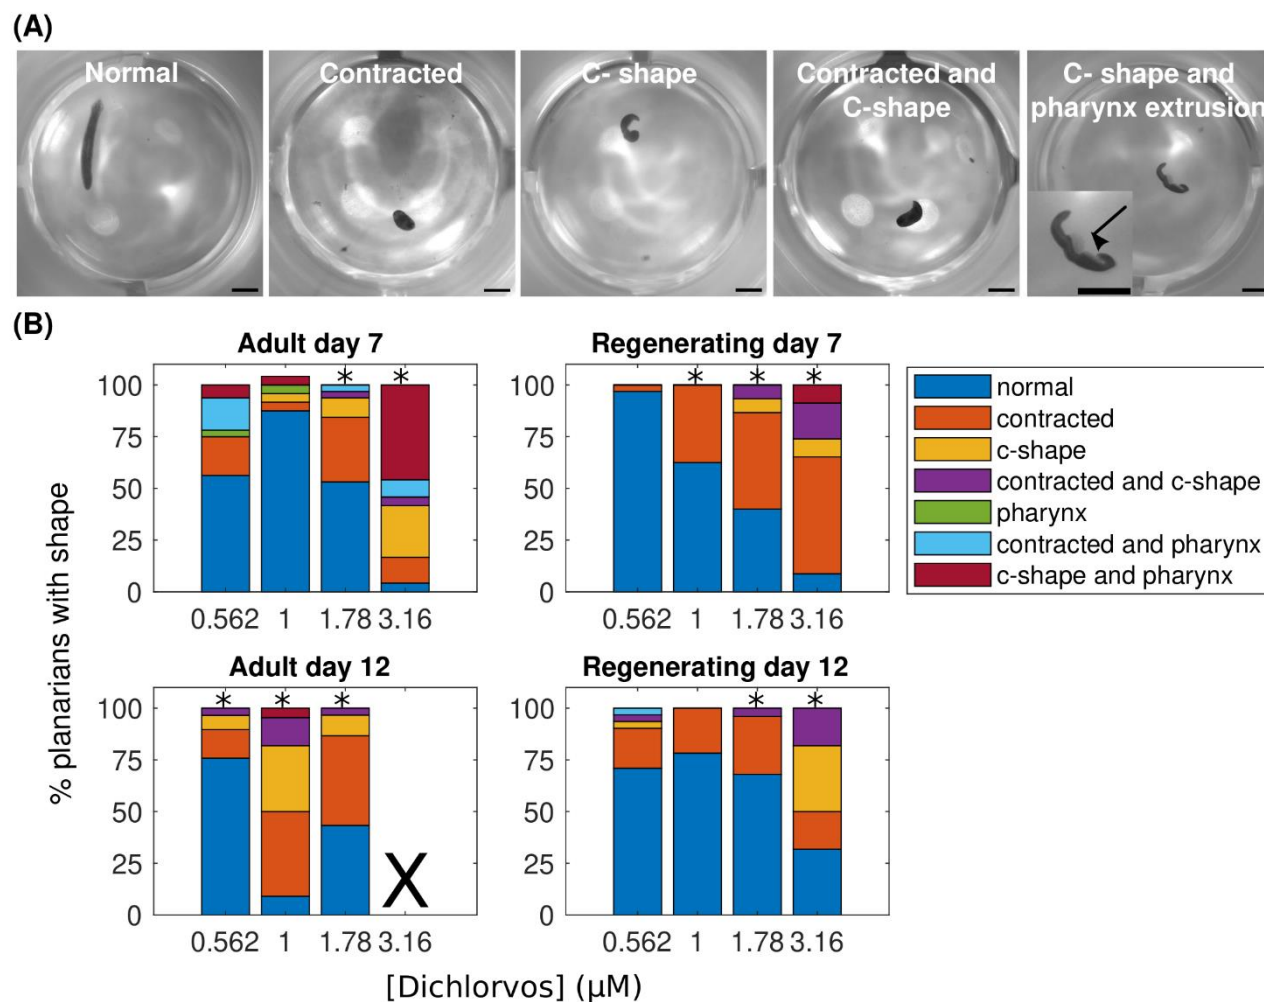

1210

1211 **Figure 3. Abnormal body shapes induced by OP exposure.** (A) Examples images of normal and  
 1212 abnormal body shapes observed in the OP-treated planarians. The normal planarian is from the  
 1213 vehicle controls. The contracted planarian was treated with 316  $\mu\text{M}$  malathion. The remaining  
 1214 images are of dichlorvos-treated planarians. Scale bar: 1 mm. Inset shows magnified image of the  
 1215 planarian with the arrow pointing to the pharynx which is extruded from the body. (B) Stacked bar  
 1216 plot showing the percentage of planarians exhibiting the different body shape categories as a function  
 1217 of dichlorvos concentration in  $\mu\text{M}$ . Concentrations which are above the BMC for the outcome  
 1218 measure are marked with \*. X indicates 100% lethality at 3.16  $\mu\text{M}$  dichlorvos in adult planarians on  
 1219 day 12.



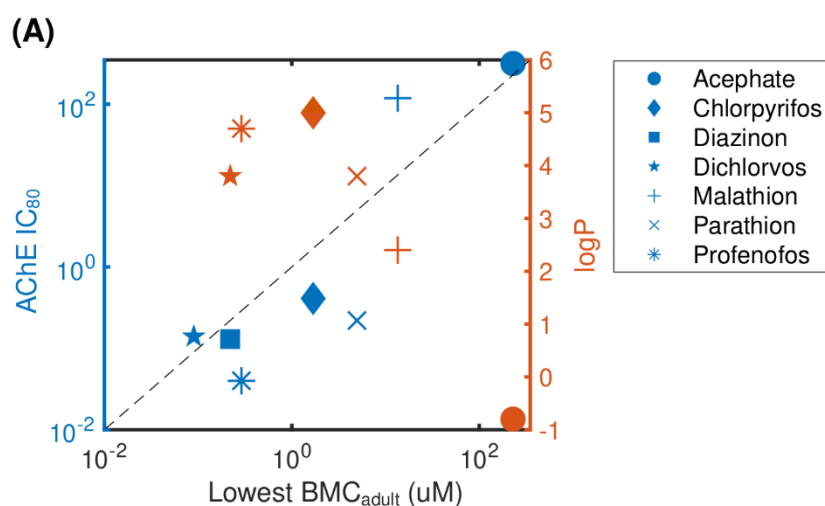

(B)

| OP           | planarian AChE IC <sub>80</sub> (SE) (uM) | rank | planarian BMC (uM) | rank |
|--------------|-------------------------------------------|------|--------------------|------|
| Acephate     | >316                                      | 7    | 229                | 7    |
| Chlorpyrifos | 0.41 (0.22)                               | 5    | 1.69               | 4    |
| Diazinon     | 0.13 (0.08)                               | 2    | 0.22               | 2    |
| Dichlorvos   | 0.14 (0.06)                               | 3    | 0.09               | 1    |
| Malathion    | 120 (100)                                 | 6    | 13.50              | 6    |
| Parathion    | 0.20 (0.08)                               | 4    | 4.96               | 5    |
| Profenofos   | 0.039 (0.011)                             | 1    | 0.29               | 3    |

1220

1221 **Figure 4. Levels of AChE inhibition is not correlated with phenotypic effects.** (A) Comparison of  
 1222 OP potency (measured by the most sensitive BMC<sub>adult</sub>) to AChE inhibition (IC<sub>80</sub>, blue) and  
 1223 hydrophobicity (logP, orange). Raw data and fitted curves from the Ellman assays are shown in  
 1224 Supplementary Figure 6. For acephate, the IC<sub>80</sub> was set to the highest test concentration since no  
 1225 inhibition was observed. The dashed line is provided as a visual tool to show when the IC<sub>80</sub> equals  
 1226 the lowest BMC<sub>adult</sub>. Blue points above this line (malathion and dichlorvos) indicate the BMC was  
 1227 more sensitive than the IC<sub>80</sub>. (B) A comparison of the ranking of the potency of the 7 OPs using the  
 1228 planarian AChE IC<sub>80</sub> and most sensitive BMC<sub>adult</sub>.

# Comparative OP neurotoxicity in planarians

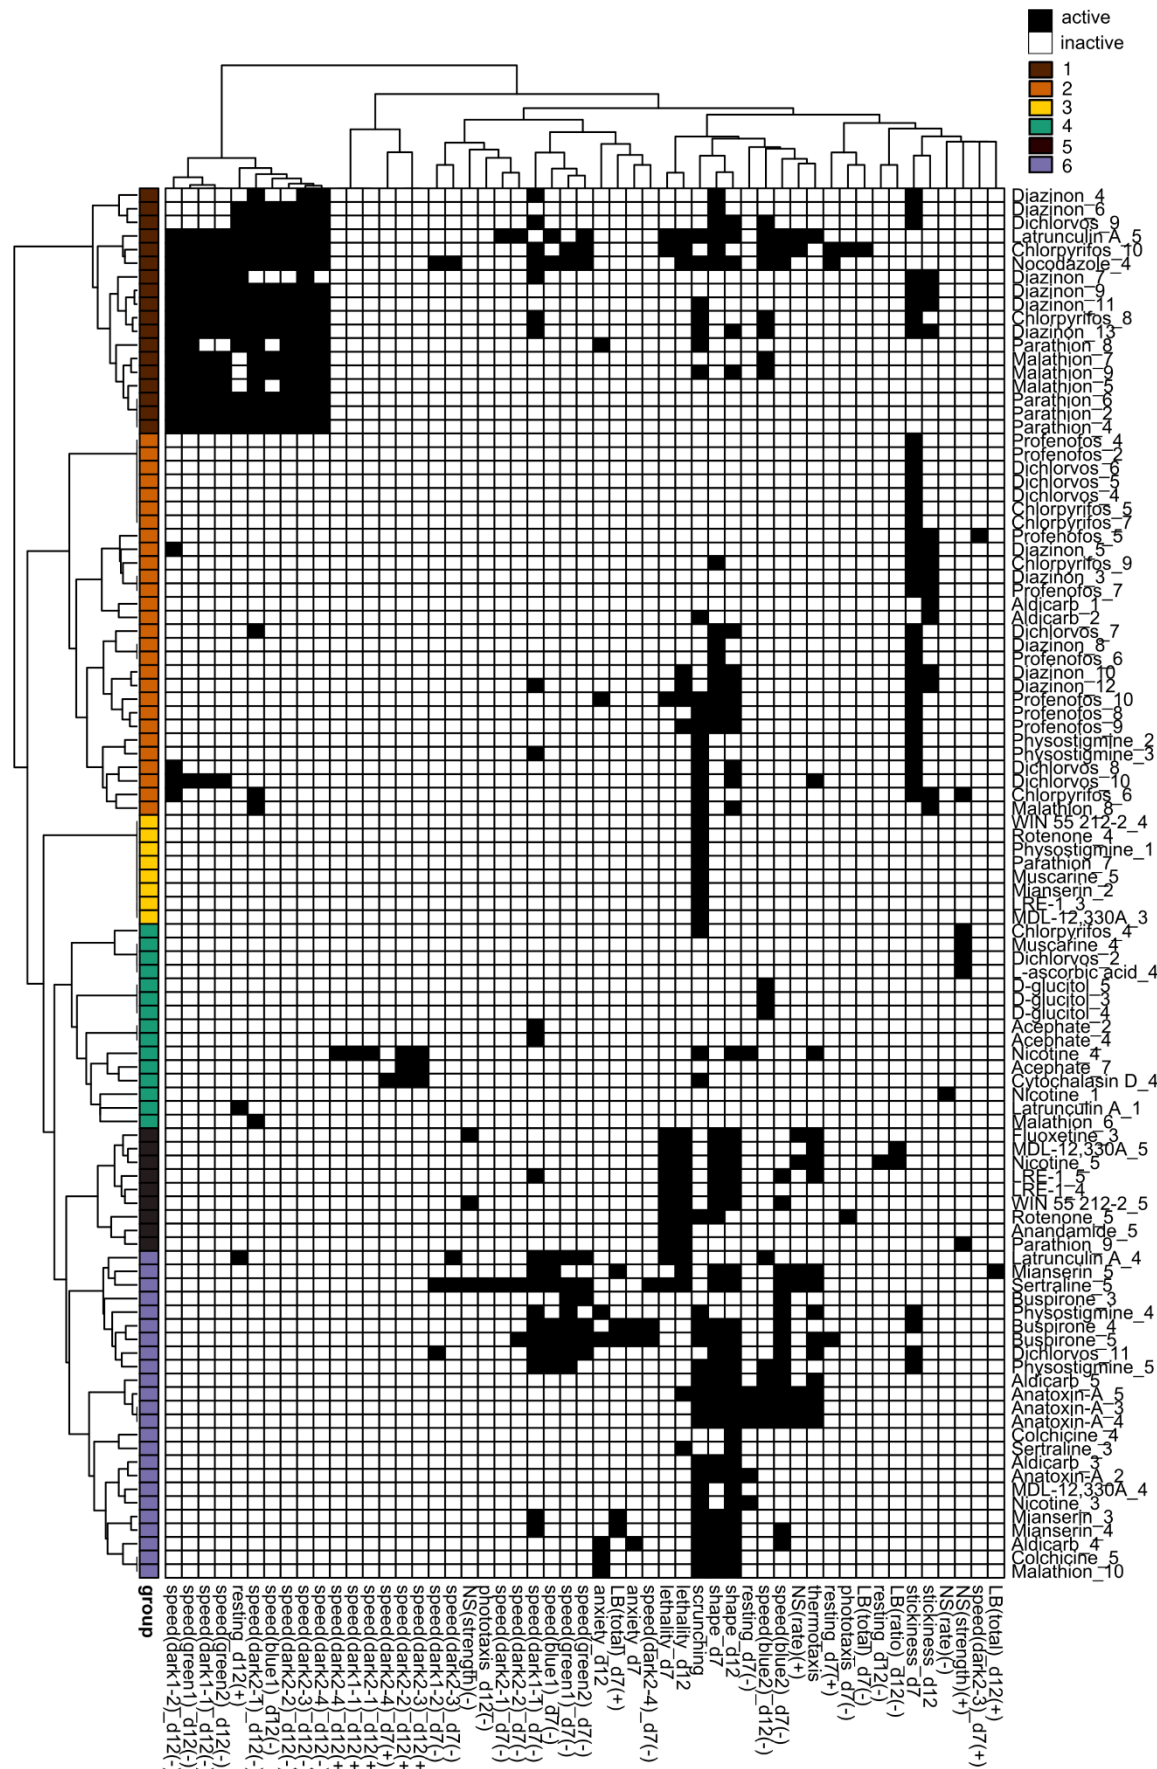

1230 **Figure 5. Hierarchical clustering of adult phenotypic barcodes.** Active outcome measures for  
1231 each chemical concentration are shown in black. Outcome measures that can have effects in both  
1232 directions are separated into either the positive (+) or negative (-) direction. Only active chemical  
1233 concentrations and outcome measures are shown. Numbers in chemical names refer to the respective  
1234 test concentration, with 1 as the lowest tested concentration, see Table 1. Hierarchical clustering was  
1235 performed using binary distance and Ward's method. Six clusters were identified with similar  
1236 phenotypic profiles: Cluster 1: Strong locomotor defects (reduced speed and increased resting),  
1237 Cluster 2: effects in primarily day 7 stickiness, Cluster 3: scrunching defects only, Cluster 4: 1 or 2  
1238 hits in miscellaneous outcome measures, Cluster 5: lethal/systemic toxicity, Cluster 6: effects in  
1239 scrunching and body shape with the addition of other outcomes.

# Comparative OP neurotoxicity in planarians

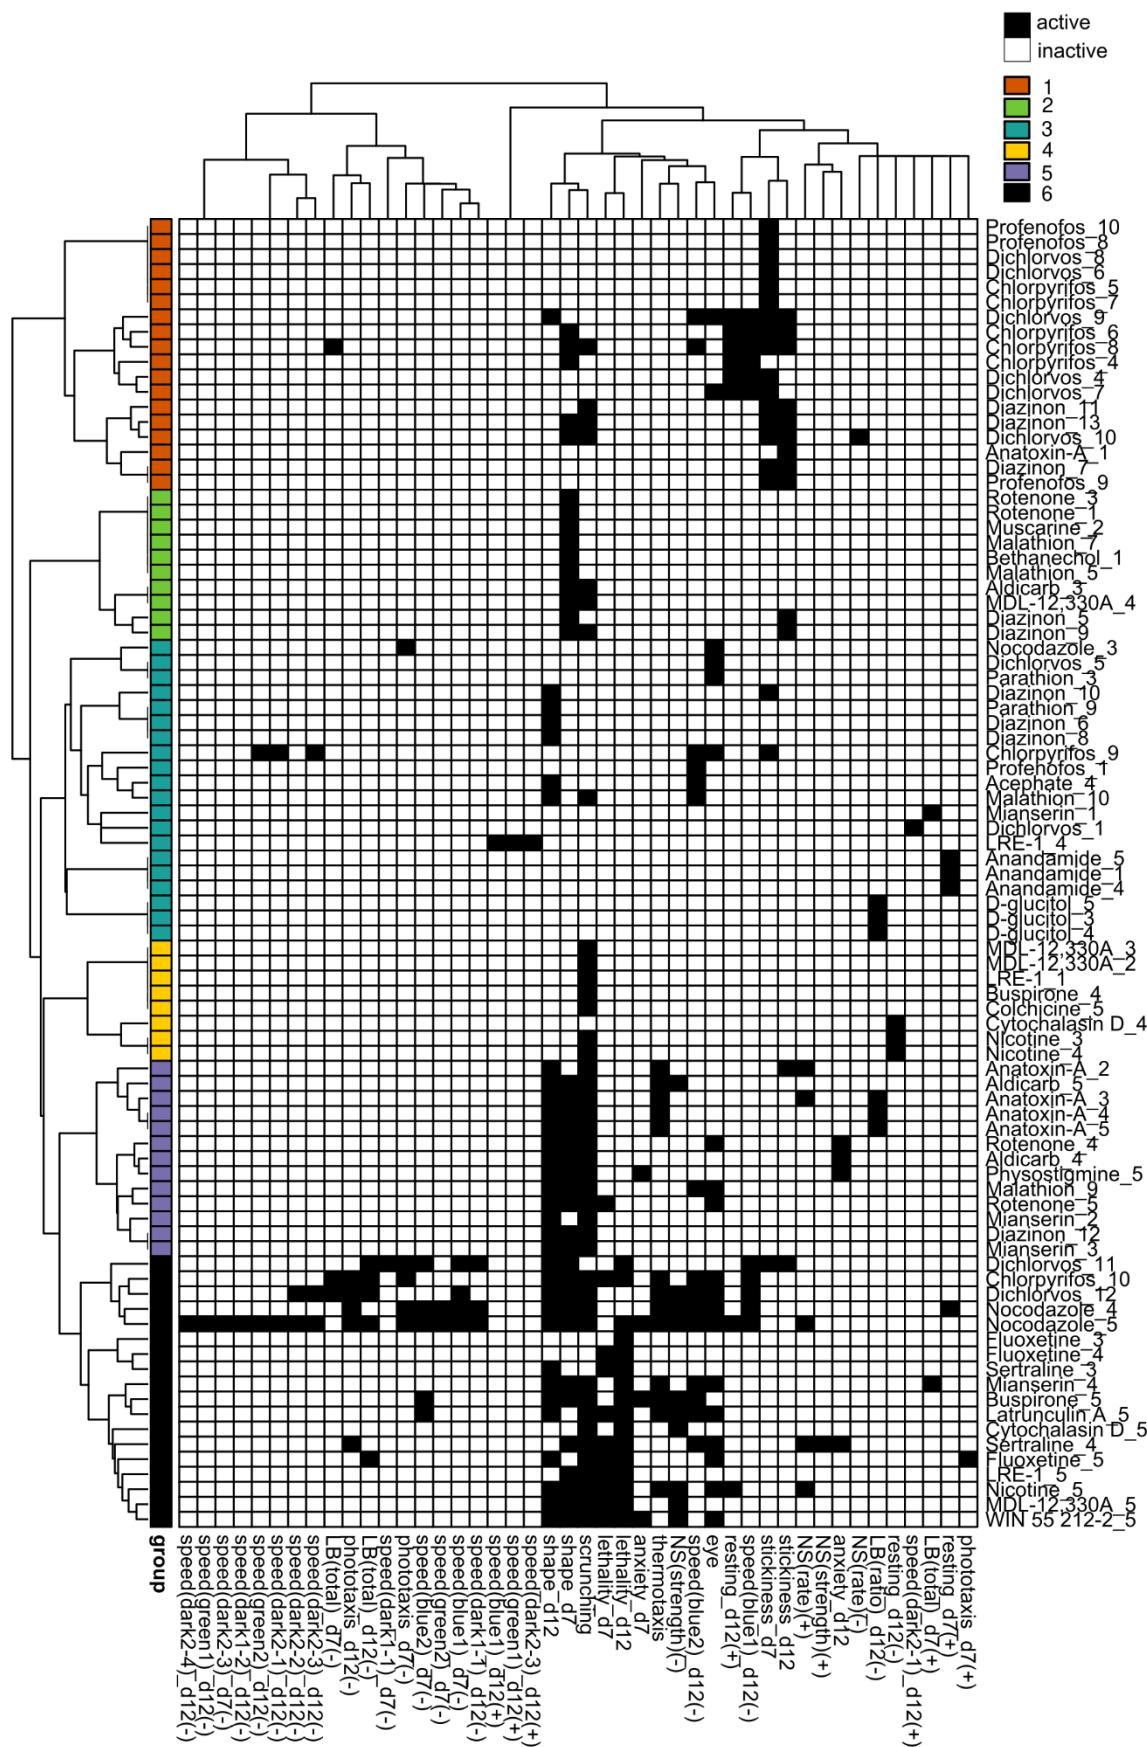

1241 **Figure 6. Hierarchical clustering of regenerating phenotypic barcodes.** Active outcome measures  
 1242 for each chemical concentration are shown in black. Outcome measures that can have effects in both  
 1243 directions are separated into either the positive (+) or negative (-) direction. Only active chemical  
 1244 concentrations and outcome measures are shown. Numbers in chemical names refer to the respective  
 1245 test concentration, with 1 as the lowest tested concentration, see Table 1. Hierarchical clustering was  
 1246 performed using binary distance and Ward's method. Six distinct clusters were identified with similar  
 1247 phenotypic profiles: Cluster 1: effects on stickiness, Cluster 2: abnormal body shapes, Cluster 3: hits  
 1248 in miscellaneous endpoints, Cluster 4: primarily scrunching defects, Cluster 5: effects in scrunching  
 1249 and body shape with the addition of other outcomes, Cluster 6: lethal/systemic toxicity.

1250

## 1251 12 Tables

1252 **Table 1. Chemical overview.** NA: not available.

| Chemical Name            | CAS          | DTXSID          | Class/mode of action                                                  | Concentration range <sup>1</sup> | Supplier       | Purity (%) |
|--------------------------|--------------|-----------------|-----------------------------------------------------------------------|----------------------------------|----------------|------------|
| Acephate                 | 30560-19-1   | DTXSID8023846   | OP                                                                    | 1.78 – 316                       | Sigma-Aldrich  | 98         |
| Chlorpyrifos             | 2921-88-2    | DTXSID4020458   | OP                                                                    | 0.178 – 31.6                     | Sigma-Aldrich  | 100        |
| Diazinon                 | 333-41-5     | DTXSID9020407   | OP                                                                    | 0.0316 – 31.6                    | Sigma-Aldrich  | 98         |
| Dichlorvos               | 62-73-7      | DTXSID5020449   | OP                                                                    | 0.00562 – 3.16                   | Sigma-Aldrich  | 98         |
| Malathion                | 121-75-5     | DTXSID4020791   | OP                                                                    | 0.316 – 56.2                     | MP Biomedicals | 96         |
| Parathion                | 56-38-2      | DTXSID7021100   | OP                                                                    | 0.178 – 31.6                     | Sigma-Aldrich  | 100        |
| Profenofos               | 41198-08-7   | DTXSID3032464   | OP                                                                    | 0.0562 – 10                      | Chem Service   | 97         |
| Aldicarb                 | 116-06-3     | DTXSID0039223   | Carbamate AChE inhibitor                                              | 3.16 – 316                       | Sigma-Aldrich  | 98         |
| Physostigmine            | 57-47-6      | DTXSID3023471   | Carbamate AChE inhibitor                                              | 0.1 -10                          | Sigma-Aldrich  | 99         |
| Anatoxin-A               | 64285-06-9   | DTXSID50867064  | Nicotinic AChR agonist                                                | 1 – 100                          | Abcam          | 98         |
| Nicotine                 | 54-11-5      | DTXSID1020930   | Nicotinic AChR agonist                                                | 10 – 1000                        | Sigma-Aldrich  | 98         |
| Muscarine chloride       | 2936-25-6    | DTXSID40861854  | Muscarinic AChR agonist                                               | 1 – 100                          | Sigma-Aldrich  | 98         |
| Bethanechol chloride     | 590-63-6     | DTXSID2022676   | Muscarinic AChR agonist                                               | 3.16 – 316                       | TCI America    | 98         |
| Buspirone hydrochloride  | 33386-08-2   | DTXSID1037193   | Serotonin (5-HT) 1 receptor agonist                                   | 1 – 100                          | Sigma-Aldrich  | 99         |
| Mianserin hydrochloride  | 21535-47-7   | DTXSID30944145  | Serotonin (5-HT) 1 receptor antagonist; Histamine H1-receptor agonist | 1 – 100                          | Sigma-Aldrich  | 98         |
| Fluoxetine hydrochloride | 56296-78-7   | DTXSID7020635   | Selective serotonin reuptake inhibitor                                | 1 – 100                          | Sigma-Aldrich  | 98         |
| Sertraline hydrochloride | 79559-97-0   | DTXSID1040243   | Selective serotonin reuptake inhibitor                                | 1 – 100                          | Sigma-Aldrich  | 98         |
| MDL-12,330A              | 40297-09-4   | DTXSID10432999  | Adenyl cyclase inhibitor                                              | 1 – 100                          | Sigma-Aldrich  | 98         |
| LRE-1                    | 1252362-53-0 | NA              | Adenyl cyclase inhibitor                                              | 1 – 100                          | Sigma-Aldrich  | 98         |
| Colchicine               | 64-86-8      | DTXSID5024845   | Disrupts microtubule polymerization                                   | 3.16 – 316                       | Acros Organics | 97         |
| Nocodazole               | 31430-18-9   | DTXSID9031800   | Disrupts microtubule polymerization                                   | 0.1 – 10 nM                      | Sigma-Aldrich  | 98         |
| Cytochalasin D           | 22144-77-0   | DTXSID8037099   | Disrupts actin polymerization                                         | 0.316 – 31.6                     | MP Biomedicals | 99         |
| Latrunculin A            | 76343-93-6   | DTXSID90893488  | Disrupts actin polymerization                                         | 0.316 – 31.6 nM                  | Sigma-Aldrich  | 95         |
| Anandamide               | 94421-68-8   | DTXSID301017453 | Endocannabinoid                                                       | 1 – 100                          | Sigma-Aldrich  | 97         |
| WIN 55 212-2 mesylate    | 131543-23-2  | DTXSID50424974  | CB-1 receptor agonist                                                 | 0.1 – 10                         | Sigma-Aldrich  | 98         |
| L-buthionine sulfoxime   | 83730-53-4   | DTXSID70894150  | Induces oxidative stress                                              | 0.1 – 10 mM                      | Sigma-Aldrich  | 97         |
| Rotenone                 | 83-79-4      | DTXSID6021248   | Induces oxidative stress                                              | 3.16 – 316 nM                    | Sigma-Aldrich  | 100        |
| L-ascorbic acid          | 50-81-7      | DTXSID5020106   | Negative control                                                      | 1 – 100                          | Alfa Aesar     | 99         |
| D-glucitol               | 50-70-4      | DTXSID5023588   | Negative control                                                      | 1 – 100                          | Sigma-Aldrich  | 99         |

1253 <sup>1</sup>unless otherwise stated, concentrations are in  $\mu\text{M}$

1254 **Table 2. Binary endpoints.** The standard deviation (SD) of the vehicle controls and benchmark  
 1255 response (BMR) are compared for each endpoint on day 7(d7) and day 12 (d12), except for eye  
 1256 regeneration and scrunching which were only evaluated on d7 and d12, respectively.  
 1257

| Endpoint         | Description                                    | Adult             |                   | Regenerating      |                   |
|------------------|------------------------------------------------|-------------------|-------------------|-------------------|-------------------|
|                  |                                                | SD (%)            | BMR (%)           | SD (%)            | BMR (%)           |
| Lethality        | % dead                                         | d7: 1<br>d12: 3   | d7: 10<br>d12: 20 | d7: 0<br>d12: 2   | d7: 10<br>d12: 15 |
| Body shape       | % individuals with any abnormal body shape     | d7: 2<br>d12: 6   | d7: 20<br>d12: 25 | d7: 6<br>d12: 6   | d7: 30<br>d12: 25 |
| Stickiness       | % stuck individuals                            | d7: 26<br>d12: 22 | d7: 50<br>d12: 50 | d7: 18<br>d12: 20 | d7: 50<br>d12: 50 |
| Eye regeneration | % individuals with abnormally regenerated eyes | ----              |                   | d7:12             | d7:55             |
| Scrunching       | % non-scrunching planarians                    | d12: 11           | d12: 25           | d12: 13           | d12: 50           |

1258

1259 **Table 3. Continuous endpoints.** The standard deviation (SD) of the normalized response in the  
 1260 vehicle controls and benchmark response (BMR) are compared for each endpoint on day 7 (d7) and  
 1261 day 12 (d12). Some endpoints can have effects in both the positive and negative directions. In these  
 1262 cases, the BMRs for each direction (increasing (+) or decreasing (-)) are shown.  
 1263

| Endpoint        | Description                                                                   | Normalization                                                                  | Adult             |                                      | Regenerating      |                                     |
|-----------------|-------------------------------------------------------------------------------|--------------------------------------------------------------------------------|-------------------|--------------------------------------|-------------------|-------------------------------------|
|                 |                                                                               |                                                                                | SD                | BMR                                  | SD                | BMR                                 |
| Speed (dark1-1) | Mean speed (mm/s) in 1 <sup>st</sup> 30 seconds of 1 <sup>st</sup> dark cycle | $(\text{Response}_{\text{chemical}} - \text{Response}_{\text{vehicle}}) * 100$ | d7: 58<br>d12: 51 | d7: 90/35 (+/-)<br>d12: 85/45 (+/-)  | d7: 37<br>d12: 51 | d7: 60/35 (+/-)<br>d12: 90/60 (+/-) |
| Speed (dark1-2) | Mean speed (mm/s) in 2 <sup>nd</sup> 30 seconds of 1 <sup>st</sup> dark cycle | $(\text{Response}_{\text{chemical}} - \text{Response}_{\text{vehicle}}) * 100$ | d7: 62<br>d12: 54 | d7: 110/90 (+/-)<br>d12: 90/45 (+/-) | d7: 37<br>d12: 54 | d7: 60/40 (+/-)<br>d12: 100/60      |
| Speed (green1)  | Mean speed (mm/s) in 1 <sup>st</sup> first 30 seconds of green cycle          | $(\text{Response}_{\text{chemical}} - \text{Response}_{\text{vehicle}}) * 100$ | d7: 60<br>d12: 49 | d7: 70/65 (+/-)<br>d12: 85/45 (+/-)  | d7: 34<br>d12: 51 | d7: 50/30 (+/-)<br>d12: 85/60 (+/-) |
| Speed (green2)  | Mean speed (mm/s) in 2 <sup>nd</sup> 30 seconds of green cycle                | $(\text{Response}_{\text{chemical}} - \text{Response}_{\text{vehicle}}) * 100$ | d7: 64<br>d12: 57 | d7: 60/95 (+/-)<br>d12: 95/60 (+/-)  | d7: 37<br>d12: 55 | d7: 60/115 (+/-)<br>d12: 115/65     |
| Speed (dark2-1) | Mean speed (mm/s) in 1 <sup>st</sup> 30 seconds of 2 <sup>nd</sup> dark cycle | $(\text{Response}_{\text{chemical}} - \text{Response}_{\text{vehicle}}) * 100$ | d7: 52<br>d12: 47 | d7: 50/70 (+/-)<br>d12: 60/30 (+/-)  | d7: 26<br>d12: 46 | d7: 35/30 (+/-)<br>d12: 55/50 (+/-) |
| Speed (dark2-2) | Mean speed (mm/s) in 2 <sup>nd</sup> 30 seconds of 2 <sup>nd</sup> dark cycle | $(\text{Response}_{\text{chemical}} - \text{Response}_{\text{vehicle}}) * 100$ | d7: 57<br>d12: 53 | d7: 60/90 (+/-)<br>d12: 50/55 (+/-)  | d7: 29<br>d12: 48 | d7: 40/30 (+/-)<br>d12:             |

|                                  |                                                                                          |                                                                              |                   |                                              |                   |                                             |
|----------------------------------|------------------------------------------------------------------------------------------|------------------------------------------------------------------------------|-------------------|----------------------------------------------|-------------------|---------------------------------------------|
|                                  |                                                                                          |                                                                              |                   |                                              |                   | 100/45<br>(+/-)                             |
| Speed<br>(dark2-3)               | Mean speed (mm/s) in 3 <sup>rd</sup><br>30 seconds of 2 <sup>nd</sup> dark<br>cycle      | (Response <sub>chemical</sub> -<br>Response <sub>vehicle</sub> )*100         | d7: 57<br>d12: 53 | d7: 65/75<br>(+/-)<br>d12: 65/35<br>(+/-)    | d7: 32<br>d12: 48 | d7: 40/30<br>(+/-)<br>d12:<br>90/45(+/-)    |
| Speed<br>(dark2-4)               | Mean speed (mm/s) in 4 <sup>th</sup><br>30 seconds of 2 <sup>nd</sup> dark<br>cycle      | (Response <sub>chemical</sub> -<br>Response <sub>vehicle</sub> )*100         | d7: 57<br>d12: 53 | d7: 65/90<br>(+/-)<br>d12: 80/45<br>(+/-)    | d7: 33<br>d12: 48 | d7: 45/30<br>(+/-)<br>d12: 95/60<br>(+/-)   |
| Speed<br>(blue1)                 | Mean speed (mm/s) in 1 <sup>st</sup><br>30 seconds of blue cycle                         | (Response <sub>chemical</sub> -<br>Response <sub>vehicle</sub> )*100         | d7: 49<br>d12: 49 | d7: 45/60<br>(+/-)<br>d12:65/55<br>(+/-)     | d7: 27<br>d12: 47 | d7: 45/20<br>(+/-)<br>d12: 70/45<br>(+/-)   |
| Speed<br>(blue2)                 | Mean speed (mm/s) in 2 <sup>nd</sup><br>30 seconds of blue cycle                         | (Response <sub>chemical</sub> -<br>Response <sub>vehicle</sub> )*100         | d7: 47<br>d12: 49 | d7: 65/75<br>(+/-)<br>d12: 60/70<br>(+/-)    | d7: 33<br>d12: 49 | d7: 50/45<br>(+/-)<br>d12:80/55<br>(+/-)    |
| Resting                          | Fraction of time spent<br>resting in 2 <sup>nd</sup> dark cycle                          | (Response <sub>chemical</sub> -<br>Response <sub>vehicle</sub> )*100         | d7: 40<br>d12: 42 | d7: 65/40<br>(+/-)<br>d12: 45/70<br>(+/-)    | d7: 31<br>d12: 38 | d7: 35/60<br>(+/-)<br>d12: 50/55<br>(+/-)   |
| Phototaxis                       | Average speed in blue<br>cycle -2 <sup>nd</sup> minute of 2 <sup>nd</sup><br>dark cycle  | (Response <sub>chemical</sub> -<br>Response <sub>vehicle</sub> )*100         | d7: 27<br>d12: 23 | d7: 35/45<br>(+/-)<br>d12:30/40<br>(+/-)     | d7: 19<br>d12: 26 | d7: 30/20<br>(+/-)<br>d12: 35/35<br>(+/-)   |
| Anxiety                          | Fraction of time spent in<br>outer region of well                                        | (Response <sub>chemical</sub> /<br>Response <sub>vehicle</sub> )*100-<br>100 | d7: 23<br>d12: 32 | d7: 35 (-)<br>d12: 25 (-)                    | d7: 32<br>d12: 32 | d7: 40 (-)<br>d12: 35 (-)                   |
| Locomotor<br>bursts (total)      | Sum of locomotor bursts<br>in phototaxis assay                                           | Response <sub>chemical</sub> -<br>Response <sub>vehicle</sub>                | d7: 19<br>d12: 21 | d7: 11/7 (+/-<br>)<br>d12: 11/6<br>(+/-)     | d7: 23<br>d12: 22 | d7: 18/11<br>(+/-)<br>d12: 9/6<br>(+/-)     |
| Locomotor<br>bursts (ratio)      | # locomotor bursts in<br>blue cycle/ # locomotor<br>bursts in 2 <sup>nd</sup> dark cycle | Response <sub>chemical</sub> -<br>Response <sub>vehicle</sub>                | d7: 2.5<br>d12: 3 | d7: 5.5/3.5<br>(+/-)<br>d12:5.5/3.5<br>(+/-) | d7: 3<br>d12: 3   | d7: 5.5/4<br>(+/-)<br>d12:4.5/3.<br>5 (+/-) |
| Thermotaxis                      | Fraction of time in cold<br>zone                                                         | (Response <sub>chemical</sub> /<br>Response <sub>vehicle</sub> )*100-<br>100 | d12: 22           | d12: 45(-)                                   | d12: 23           | d12: 40 (-)                                 |
| Noxious<br>stimuli (rate)        | Rate of change in<br>displacement in response<br>to heat (Ireland et al.,<br>2020)       | (Response <sub>chemical</sub> -<br>Response <sub>vehicle</sub> )*100         | d12: 17           | d12: 35/ 25<br>(+/-)                         | d12: 20           | d12: 35/30<br>(+/-)                         |
| Noxious<br>stimuli<br>(strength) | Median displacement at<br>end of noxious heat<br>(Ireland et al., 2020)                  | (Response <sub>chemical</sub> /<br>Response <sub>vehicle</sub> )*100-<br>100 | d12: 45           | d12: 50/65<br>(+/-)                          | d12: 48           | d12: 50/65<br>(+/-)                         |

1264

1265 **Table 4. OP concentrations tested in Ellman assays.**

| Chemical Name | Concentrations tested ( $\mu$ M) |
|---------------|----------------------------------|
| Acephate      | 0.0316, 0.316, 3.16, 31.6, 316   |
| Chlorpyrifos  | 0.00316, 0.0316, 0.316, 3.16, 10 |

|            |                                         |
|------------|-----------------------------------------|
| Diazinon   | 0.0001, 0.001, 0.01, 0.178, 0.316, 3.16 |
| Dichlorvos | 0.0001, 0.001, 0.01, 0.1, 0.316, 3.16   |
| Malathion  | 0.0316, 0.316, 3.16, 10, 56.2, 100      |
| Parathion  | 0.000316, 0.00316, 0.0316, 0.316, 3.16  |
| Profenofos | 0.000316, 0.00316, 0.0316, 0.316, 1.78  |

1266
